# Supplementary material for: Sex-age-specific association of body mass index with all-cause mortality among 12.8 million Korean adults: a prospective cohort study
Source: PubMed Central journal article supplement — Int J Epidemiol. 2015 Jul 23;44(5):1696–705. doi: 10.1093/ije/dyv138 (PMC4681110; doi:10.1093/ije/dyv138), 2015-07-23
Supplement: supp_dyv138_Supplement_Tables_and_Figures.pdf [file supp_dyv138_Supplement_Tables_and_Figures.pdf]

**Online-only Supplementary Data**

Sex-age-specific association of body mass index with all-cause mortality among 12.8 million  
Korean adults : a prospective cohort study

**Sang-Wook Yi**, MD, PhD, Department of Preventive Medicine and Public Health, Catholic Kwandong University College of Medicine, Republic of Korea; **Heechoul Ohrr**, MD, PhD, Department of Preventive Medicine, Graduate School of Public Health, Yonsei University, Republic of Korea; **Soon-Ae Shin**, PhD, Big Data Steering Department, National Health Insurance Service, Seoul, Republic of Korea; **Jee-Jeon Yi**, PhD, Institute for Occupational and Environmental Health, Catholic Kwandong University, Republic of Korea

18 May, 2015

Correspondence: Sang-Wook Yi, MD, PhD, Department of Preventive Medicine and Public Health, Catholic Kwandong University College of Medicine, Bumil-ro 579, Gangneung, Gangwon-do, 210-701, Republic of Korea; Tel: +82-33-649-7468; Fax +82-33-641-1074-mail: [flyhigh@cku.ac.kr](mailto:flyhigh@cku.ac.kr)

|                                                                                                                                                                                            |    |
|--------------------------------------------------------------------------------------------------------------------------------------------------------------------------------------------|----|
| Table S1. Characteristics of Korean participants at health exams managed by NHIS during 2001-2004. ....                                                                                    | 1  |
| Table S2. Death rate and hazard ratio of death associated with body mass index according to sex and age among all participants (n=12,832,637). ....                                        | 2  |
| Table S3. Apparent optimal and acceptable ranges of body mass index for longevity in never-smokers. ....                                                                                   | 5  |
| Table S4. Death rate and hazard ratio of death associated with 11 categories of body mass index according to smoking status and age in men among all participants (n=7,300,575). ....      | 6  |
| Table S5. Death rate and hazard ratio of death associated with seven categories of body mass index according to smoking status and age in women among all participants (n=5,532,062). .... | 8  |
| Table S6. Hazard ratio of death associated with the standard five body mass index categories according to six sex-age groups among all participants and never-smokers. ....                | 9  |
| Table S7. Hazard ratio of death associated with the standard four body mass index categories according to six sex-age groups among all participants and never-smokers. ....                | 12 |
| Figure S1. Hazard ratios of risk of death associated with body mass index according to subgroup in all participants and never-smokers. ....                                                | 14 |
| Figure S2. Age-specific hazard ratios of risk of death associated with body mass index in men. ....                                                                                        | 15 |
| Figure S3. Age-specific hazard ratios of risk of death associated with body mass index in women. ....                                                                                      | 16 |
| Figure S4. Hazard ratios of risk of death associated with body mass index according to smoking status and sex in all participants and those with no known illness. ....                    | 17 |
| Figure S5. Age-specific hazard ratios of risk of death associated with body mass index according to sex in never-smokers. ....                                                             | 18 |
| Figure S6. Sex-age-specific hazard ratios of risk of death associated with body mass index in never-smokers with no known illness. ....                                                    | 19 |
| Figure S7. Sex-age-specific hazard ratios of risk of death associated with body mass index in never-smokers with no known illness who survived 5 years after enrollment. ....              | 20 |
| Figure S8. Age-specific hazard ratios of risk of death associated with body mass index in participants with no known illness according to sex and smoking status. ....                     | 21 |

**Table S1. Characteristics of Korean participants at health exams managed by NHIS during 2001-2004.**

| Variables                               | Classification | All participants<br>(n=12,832,637) | Never-smokers<br>(n=7,436,748) | Participants<br>with no known<br>illness <sup>a</sup><br>(n=10,741,411) | Never-smokers<br>with no known<br>illness <sup>a</sup><br>(n=6,165,978) | Survivors<br>after 5 years of<br>follow-up <sup>b</sup><br>(n=12,561,289) | Never-smoker<br>survivors after 5<br>years of<br>follow-up <sup>b</sup><br>(n=7,292,310) |
|-----------------------------------------|----------------|------------------------------------|--------------------------------|-------------------------------------------------------------------------|-------------------------------------------------------------------------|---------------------------------------------------------------------------|------------------------------------------------------------------------------------------|
|                                         |                | n (%)                              | n (%)                          | n (%)                                                                   | n (%)                                                                   | n (%)                                                                     | n (%)                                                                                    |
| BMI (kg/m <sup>2</sup> )                | Mean (SD)      | 23.5 (3.2)                         | 23.4 (3.2)                     | 23.4 (3.1)                                                              | 23.2 (3.2)                                                              | 23.5 (3.2)                                                                | 23.4 (3.2)                                                                               |
| Age (years)                             | Mean (SD)      | 44.4 (14.2)                        | 46.0 (14.7)                    | 42.7 (13.6)                                                             | 44.0 (14.2)                                                             | 44.0 (13.9)                                                               | 45.6 (14.5)                                                                              |
| Sex                                     | Men            | 7,300,575 (56.9)                   | 2,523,287 (33.9)               | 6,173,507 (57.5)                                                        | 2,098,479 (34.0)                                                        | 7,116,052 (56.7)                                                          | 2,451,979 (33.6)                                                                         |
|                                         | Women          | 5,532,062 (43.1)                   | 4,913,461 (66.1)               | 4,567,904 (42.5)                                                        | 4,067,499 (66.0)                                                        | 5,445,237 (43.3)                                                          | 4,840,331 (66.4)                                                                         |
| Known illness <sup>c</sup>              | No             | 10,741,411 (83.7)                  | 6,165,978 (82.9)               | 10,741,411 (100.0)                                                      | 6,165,978 (100.0)                                                       | 10,568,440 (84.1)                                                         | 6,077,755 (83.3)                                                                         |
|                                         | Yes            | 1,985,759 (15.5)                   | 1,270,770 (17.1)               | 0 (0.0)                                                                 | 0 (0.0)                                                                 | 1,888,618 (15.0)                                                          | 1,214,555 (16.7)                                                                         |
|                                         | Missing        | 105,467 (0.8)                      | 0 (0.0)                        | 0 (0.0)                                                                 | 0 (0.0)                                                                 | 104,231 (0.8)                                                             | 0 (0.0)                                                                                  |
| Smoking<br>status <sup>c</sup>          | Current smoker | 3,657,466 (28.5)                   | 0 (0.0)                        | 3,204,403 (29.8)                                                        | 0 (0.0)                                                                 | 3,570,546 (28.4)                                                          | 0 (0.0)                                                                                  |
|                                         | Never-smoker   | 7,436,748 (58.0)                   | 7,436,748 (100.0)              | 6,165,978 (57.4)                                                        | 6,165,978 (100.0)                                                       | 7,292,310 (58.1)                                                          | 7,292,310 (100.0)                                                                        |
|                                         | Former smoker  | 1,100,650 (8.6)                    | 0 (0.0)                        | 885,478 (8.2)                                                           | 0 (0.0)                                                                 | 1,073,612 (8.5)                                                           | 0 (0.0)                                                                                  |
|                                         | Missing        | 637,773 (5.0)                      | 0 (0.0)                        | 485,552 (4.5)                                                           | 0 (0.0)                                                                 | 624,821 (5.0)                                                             | 0 (0.0)                                                                                  |
| Age (years)<br>(10 groups)              | 18-34          | 3,732,998 (29.1)                   | 1,896,608 (25.5)               | 3,496,103 (32.5)                                                        | 1,813,174 (29.4)                                                        | 3,724,727 (29.7)                                                          | 1,893,601 (26.0)                                                                         |
|                                         | 35-39          | 1,242,617 (9.7)                    | 542,846 (7.3)                  | 1,131,091 (10.5)                                                        | 502,606 (8.2)                                                           | 1,237,269 (9.8)                                                           | 541,215 (7.4)                                                                            |
|                                         | 40-44          | 2,017,480 (15.7)                   | 1,185,116 (15.9)               | 1,780,732 (16.6)                                                        | 1,054,824 (17.1)                                                        | 2,004,187 (16.0)                                                          | 1,179,735 (16.2)                                                                         |
|                                         | 45-49          | 1,413,387 (11.0)                   | 833,882 (11.2)                 | 1,198,024 (11.2)                                                        | 712,907 (11.6)                                                          | 1,398,984 (11.1)                                                          | 828,123 (11.4)                                                                           |
|                                         | 50-54          | 1,306,826 (10.2)                   | 837,666 (11.3)                 | 1,029,178 (9.6)                                                         | 659,297 (10.7)                                                          | 1,285,962 (10.2)                                                          | 828,512 (11.4)                                                                           |
|                                         | 55-59          | 843,953 (6.6)                      | 549,779 (7.4)                  | 625,657 (5.8)                                                           | 404,696 (6.6)                                                           | 823,513 (6.6)                                                             | 540,194 (7.4)                                                                            |
|                                         | 60-64          | 1,022,354 (8.0)                    | 708,172 (9.5)                  | 695,760 (6.5)                                                           | 475,817 (7.7)                                                           | 981,333 (7.8)                                                             | 686,976 (9.4)                                                                            |
|                                         | 65-69          | 569,545 (4.4)                      | 396,472 (5.3)                  | 363,270 (3.4)                                                           | 248,477 (4.0)                                                           | 531,021 (4.2)                                                             | 375,673 (5.2)                                                                            |
|                                         | 70-74          | 428,365 (3.3)                      | 304,272 (4.1)                  | 259,584 (2.4)                                                           | 180,918 (2.9)                                                           | 380,714 (3.0)                                                             | 276,368 (3.8)                                                                            |
|                                         | 75-99          | 255,112 (2.0)                      | 181,935 (2.4)                  | 162,012 (1.5)                                                           | 113,262 (1.8)                                                           | 193,579 (1.5)                                                             | 141,913 (1.9)                                                                            |
| BMI (kg/m <sup>2</sup> )<br>(18 groups) | <16.0          | 24,949 (0.2)                       | 16,505 (0.2)                   | 20,015 (0.2)                                                            | 13,682 (0.2)                                                            | 21,582 (0.2)                                                              | 14,735 (0.2)                                                                             |
|                                         | 16.0-17.4      | 173,454 (1.4)                      | 116,738 (1.6)                  | 150,150 (1.4)                                                           | 104,238 (1.7)                                                           | 164,330 (1.3)                                                             | 112,318 (1.5)                                                                            |
|                                         | 17.5-18.9      | 656,921 (5.1)                      | 425,489 (5.7)                  | 578,157 (5.4)                                                           | 383,603 (6.2)                                                           | 636,293 (5.1)                                                             | 415,828 (5.7)                                                                            |
|                                         | 19.0-19.9      | 839,267 (6.5)                      | 519,293 (7.0)                  | 737,859 (6.9)                                                           | 463,947 (7.5)                                                           | 817,884 (6.5)                                                             | 509,063 (7.0)                                                                            |
|                                         | 20.0-20.9      | 1,157,683 (9.0)                    | 698,362 (9.4)                  | 1,009,462 (9.4)                                                         | 614,910 (10.0)                                                          | 1,130,797 (9.0)                                                           | 685,326 (9.4)                                                                            |
|                                         | 21.0-21.9      | 1,391,331 (10.8)                   | 821,328 (11.0)                 | 1,197,071 (11.1)                                                        | 707,858 (11.5)                                                          | 1,360,861 (10.8)                                                          | 805,789 (11.0)                                                                           |
|                                         | 22.0-22.9      | 1,561,228 (12.2)                   | 906,625 (12.2)                 | 1,323,758 (12.3)                                                        | 764,352 (12.4)                                                          | 1,528,973 (12.2)                                                          | 889,610 (12.2)                                                                           |
|                                         | 23.0-23.9      | 1,596,703 (12.4)                   | 903,122 (12.1)                 | 1,335,894 (12.4)                                                        | 746,036 (12.1)                                                          | 1,565,585 (12.5)                                                          | 886,327 (12.2)                                                                           |
|                                         | 24.0-24.9      | 1,546,517 (12.1)                   | 873,227 (11.7)                 | 1,275,017 (11.9)                                                        | 705,135 (11.4)                                                          | 1,518,276 (12.1)                                                          | 857,472 (11.8)                                                                           |
|                                         | 25.0-25.9      | 1,253,411 (9.8)                    | 682,928 (9.2)                  | 1,024,516 (9.5)                                                         | 542,812 (8.8)                                                           | 1,231,336 (9.8)                                                           | 670,445 (9.2)                                                                            |
|                                         | 26.0-26.9      | 947,453 (7.4)                      | 524,193 (7.0)                  | 764,319 (7.1)                                                           | 408,446 (6.6)                                                           | 931,010 (7.4)                                                             | 514,661 (7.1)                                                                            |
|                                         | 27.0-27.9      | 656,190 (5.1)                      | 364,719 (4.9)                  | 523,469 (4.9)                                                           | 279,185 (4.5)                                                           | 644,640 (5.1)                                                             | 357,847 (4.9)                                                                            |
|                                         | 28.0-28.9      | 414,763 (3.2)                      | 234,129 (3.1)                  | 326,818 (3.0)                                                           | 175,877 (2.9)                                                           | 407,619 (3.2)                                                             | 229,609 (3.1)                                                                            |
|                                         | 29.0-29.9      | 258,627 (2.0)                      | 144,412 (1.9)                  | 202,730 (1.9)                                                           | 107,230 (1.7)                                                           | 254,101 (2.0)                                                             | 141,645 (1.9)                                                                            |
|                                         | 30.0-31.4      | 199,772 (1.6)                      | 112,737 (1.5)                  | 155,233 (1.4)                                                           | 82,636 (1.3)                                                            | 196,332 (1.6)                                                             | 110,544 (1.5)                                                                            |
| 31.5-32.9                               | 88,376 (0.7)   | 53,117 (0.7)                       | 67,133 (0.6)                   | 37,901 (0.6)                                                            | 86,860 (0.7)                                                            | 52,073 (0.7)                                                              |                                                                                          |
| 33.0-34.9                               | 41,896 (0.3)   | 25,101 (0.3)                       | 31,693 (0.3)                   | 17,804 (0.3)                                                            | 41,186 (0.3)                                                            | 24,629 (0.3)                                                              |                                                                                          |
| 35.0-50.0                               | 24,096 (0.2)   | 14,723 (0.2)                       | 18,117 (0.2)                   | 10,326 (0.2)                                                            | 23,624 (0.2)                                                            | 14,389 (0.2)                                                              |                                                                                          |
| BMI (kg/m <sup>2</sup> )<br>(11 groups) | <17.5          | 198,403 (1.5)                      | 133,243 (1.8)                  | 170,165 (1.6)                                                           | 117,920 (1.9)                                                           | 185,912 (1.5)                                                             | 127,053 (1.7)                                                                            |
|                                         | 17.5-18.9      | 656,921 (5.1)                      | 425,489 (5.7)                  | 578,157 (5.4)                                                           | 383,603 (6.2)                                                           | 636,293 (5.1)                                                             | 415,828 (5.7)                                                                            |
|                                         | 19.0-20.4      | 1,372,534 (10.7)                   | 842,390 (11.3)                 | 1,204,020 (11.2)                                                        | 749,629 (12.2)                                                          | 1,338,487 (10.7)                                                          | 826,029 (11.3)                                                                           |
|                                         | 20.5-21.9      | 2,015,747 (15.7)                   | 1,196,593 (16.1)               | 1,740,372 (16.2)                                                        | 1,037,086 (16.8)                                                        | 1,971,055 (15.7)                                                          | 1,174,149 (16.1)                                                                         |
|                                         | 22.0-23.4      | 2,352,681 (18.3)                   | 1,366,395 (18.4)               | 1,987,110 (18.5)                                                        | 1,145,592 (18.6)                                                        | 2,304,691 (18.3)                                                          | 1,340,779 (18.4)                                                                         |
|                                         | 23.5-24.9      | 2,351,767 (18.3)                   | 1,316,579 (17.7)               | 1,947,559 (18.1)                                                        | 1,069,931 (17.4)                                                        | 2,308,143 (18.4)                                                          | 1,292,630 (17.7)                                                                         |
|                                         | 25.0-26.4      | 1,772,396 (13.8)                   | 968,868 (13.0)                 | 1,444,539 (13.4)                                                        | 766,602 (12.4)                                                          | 1,741,378 (13.9)                                                          | 951,246 (13.0)                                                                           |
|                                         | 26.5-27.9      | 1,084,658 (8.5)                    | 602,972 (8.1)                  | 867,765 (8.1)                                                           | 463,841 (7.5)                                                           | 1,065,608 (8.5)                                                           | 591,707 (8.1)                                                                            |
|                                         | 28.0-29.4      | 578,069 (4.5)                      | 320,423 (4.3)                  | 456,274 (4.2)                                                           | 240,676 (3.9)                                                           | 568,118 (4.5)                                                             | 314,260 (4.3)                                                                            |
|                                         | 29.5-30.9      | 248,943 (1.9)                      | 144,574 (1.9)                  | 192,935 (1.8)                                                           | 106,004 (1.7)                                                           | 244,597 (1.9)                                                             | 141,788 (1.9)                                                                            |
|                                         | 31.0-50.0      | 200,518 (1.6)                      | 119,222 (1.6)                  | 152,515 (1.4)                                                           | 85,094 (1.4)                                                            | 197,007 (1.6)                                                             | 116,841 (1.6)                                                                            |
| BMI (kg/m <sup>2</sup> )<br>(5 groups)  | <18.5          | 562,423 (4.4)                      | 370,567 (5.0)                  | 490,312 (4.6)                                                           | 332,105 (5.4)                                                           | 537,692 (4.3)                                                             | 358,576 (4.9)                                                                            |
|                                         | 18.5-24.9      | 8,385,630 (65.3)                   | 4,910,122 (66.0)               | 7,137,071 (66.4)                                                        | 4,171,656 (67.7)                                                        | 8,206,889 (65.3)                                                          | 4,817,892 (66.1)                                                                         |
|                                         | 25.0-29.9      | 3,530,444 (27.5)                   | 1,950,381 (26.2)               | 2,841,852 (26.5)                                                        | 1,513,550 (24.5)                                                        | 3,468,706 (27.6)                                                          | 1,914,207 (26.2)                                                                         |
|                                         | 30.0-34.9      | 330,044 (2.6)                      | 190,955 (2.6)                  | 254,059 (2.4)                                                           | 138,341 (2.2)                                                           | 324,378 (2.6)                                                             | 187,246 (2.6)                                                                            |
|                                         | 35.0-50.0      | 24,096 (0.2)                       | 14,723 (0.2)                   | 18,117 (0.2)                                                            | 10,326 (0.2)                                                            | 23,624 (0.2)                                                              | 14,389 (0.2)                                                                             |

BMI, body mass index; NHIS, National Health Insurance Service of Korea; SD, standard deviation

<sup>a</sup> Participants self-reported pre-existing illness either cured or not through questionnaire at enrollment.

<sup>b</sup> Those excluding the first 5-year of deaths

<sup>c</sup> Participants self-reported smoking status and known pre-existing illness either cured or not (including cardiovascular disease, cancer, liver disease, diabetes, a respiratory disease, or other diseases) through questionnaire.

**Table S2. Death rate<sup>a</sup> and hazard ratio<sup>b</sup> of death associated with body mass index according to sex and age<sup>c</sup> among all participants (n=12,832,637).**

| Table S2               |                              | Men (n=7,300,575)      |               |                         |          |                   | Women (n=5,532,062)    |               |                         |          |                   |                   |
|------------------------|------------------------------|------------------------|---------------|-------------------------|----------|-------------------|------------------------|---------------|-------------------------|----------|-------------------|-------------------|
| Age group <sup>c</sup> | BMI <sup>d</sup> at baseline | Follow-up person-years | No. of deaths | Death rate <sup>a</sup> | p- value | HR (95% CI)       | Follow-up person-years | No. of deaths | Death rate <sup>a</sup> | p- value | HR (95% CI)       |                   |
| 18-34 years            | <16                          | 20,944                 | 23            | 70                      | 0.005    | 1.81 (1.19, 2.73) | 99,281                 | 28            | 23                      | 0.921    | 1.02 (0.69, 1.52) |                   |
|                        | 16.0-17.4                    | 222,633                | 228           | 119                     | <0.001   | 1.69 (1.46, 1.95) | 894,168                | 256           | 27                      | 0.812    | 1.02 (0.85, 1.23) |                   |
|                        | 17.5-18.9                    | 1,127,545              | 926           | 78                      | <0.001   | 1.36 (1.24, 1.48) | 2,875,513              | 816           | 26                      | 0.952    | 1.00 (0.86, 1.17) |                   |
|                        | 19.0-19.9                    | 1,686,746              | 1,193         | 97                      | <0.001   | 1.17 (1.08, 1.27) | 2,712,511              | 799           | 34                      | 0.696    | 1.03 (0.88, 1.21) |                   |
|                        | 20.0-20.9                    | 2,437,836              | 1,638         | 81                      | 0.008    | 1.11 (1.03, 1.2)  | 2,616,930              | 738           | 48                      | 0.786    | 0.98 (0.84, 1.15) |                   |
|                        | 21.0-21.9                    | 2,897,173              | 1,832         | 84                      | 0.267    | 1.04 (0.97, 1.13) | 2,019,981              | 607           | 40                      | 0.684    | 1.03 (0.88, 1.21) |                   |
|                        | 22.0-22.9                    | 3,135,760              | 1,949         | 72                      | 0.587    | 1.02 (0.95, 1.1)  | 1,441,754              | 417           | 33                      | 0.882    | 0.99 (0.83, 1.17) |                   |
|                        | 23.0-23.9                    | 3,113,842              | 1,801         | 78                      | 0.121    | 0.94 (0.87, 1.02) | 951,453                | 272           | 34                      | 0.737    | 0.97 (0.81, 1.16) |                   |
|                        | 24.0-24.9                    | 2,789,606              | 1,608         | 63                      | 0.062    | 0.93 (0.86, 1)    | 659,770                | 196           | 53                      |          | 1.00 (Reference)  |                   |
|                        | 25.0-25.9                    | 2,354,421              | 1,410         | 66                      | 0.266    | 0.96 (0.88, 1.03) | 385,813                | 128           | 29                      | 0.342    | 1.11 (0.89, 1.39) |                   |
|                        | 26.0-26.9                    | 1,695,958              | 1,070         | 71                      |          | 1.00 (Reference)  | 258,983                | 116           | 76                      | 0.001    | 1.50 (1.19, 1.88) |                   |
|                        | 27.0-27.9                    | 1,192,952              | 772           | 69                      | 0.663    | 1.02 (0.93, 1.12) | 176,510                | 70            | 87                      | 0.045    | 1.32 (1.01, 1.74) |                   |
|                        | 28.0-28.9                    | 795,258                | 545           | 77                      | 0.152    | 1.08 (0.97, 1.2)  | 115,935                | 45            | 105                     | 0.128    | 1.29 (0.93, 1.78) |                   |
|                        | 29.0-29.9                    | 542,540                | 376           | 88                      | 0.157    | 1.09 (0.97, 1.22) | 76,896                 | 33            | 33                      | 0.060    | 1.42 (0.98, 2.06) |                   |
|                        | 30.0-31.4                    | 445,968                | 377           | 77                      | <0.001   | 1.33 (1.18, 1.5)  | 74,825                 | 28            | 187                     | 0.282    | 1.24 (0.84, 1.85) |                   |
|                        | 31.5-32.9                    | 199,545                | 208           | 120                     | <0.001   | 1.65 (1.42, 1.91) | 43,609                 | 14            | 28                      | 0.826    | 1.06 (0.62, 1.83) |                   |
|                        | 33.0-34.9                    | 108,266                | 102           | 87                      | <0.001   | 1.50 (1.23, 1.84) | 28,440                 | 16            | 43                      | 0.015    | 1.88 (1.13, 3.13) |                   |
|                        | 35.0-50.0                    | 66,411                 | 87            | 383                     | <0.001   | 2.13 (1.71, 2.65) | 22,443                 | 16            | 80                      | 0.001    | 2.36 (1.42, 3.92) |                   |
|                        | 35-44 years                  | <16                    | 11,209        | 94                      | 1,232    | <0.001            | 5.26 (4.28, 6.46)      | 12,725        | 51                      | 282      | <0.001            | 4.87 (3.68, 6.45) |
|                        |                              | 16.0-17.4              | 99,101        | 396                     | 663      | <0.001            | 2.60 (2.34, 2.89)      | 124,109       | 150                     | 285      | <0.001            | 1.56 (1.32, 1.85) |
| 17.5-18.9              |                              | 545,156                | 1,560         | 364                     | <0.001   | 1.91 (1.8, 2.03)  | 660,934                | 544           | 106                     | 0.193    | 1.07 (0.97, 1.19) |                   |
| 19.0-19.9              |                              | 920,922                | 2,120         | 262                     | <0.001   | 1.55 (1.47, 1.64) | 1,040,495              | 758           | 75                      | 0.138    | 0.93 (0.85, 1.02) |                   |
| 20.0-20.9              |                              | 1,502,605              | 3,192         | 262                     | <0.001   | 1.45 (1.38, 1.52) | 1,611,176              | 1,176         | 104                     | 0.055    | 0.92 (0.85, 1)    |                   |
| 21.0-21.9              |                              | 2,118,955              | 3,973         | 215                     | <0.001   | 1.28 (1.22, 1.34) | 1,873,393              | 1,414         | 101                     | 0.115    | 0.94 (0.87, 1.02) |                   |
| 22.0-22.9              |                              | 2,668,004              | 4,420         | 197                     | <0.001   | 1.14 (1.08, 1.19) | 1,891,364              | 1,460         | 88                      | 0.146    | 0.94 (0.87, 1.02) |                   |
| 23.0-23.9              |                              | 3,056,063              | 4,594         | 184                     | 0.173    | 1.03 (0.99, 1.08) | 1,624,179              | 1,234         | 82                      | 0.041    | 0.92 (0.85, 1)    |                   |
| 24.0-24.9              |                              | 3,101,345              | 4,503         | 173                     | 0.853    | 1.00 (0.95, 1.04) | 1,354,077              | 1,137         | 111                     |          | 1.00 (Reference)  |                   |
| 25.0-25.9              |                              | 2,740,819              | 3,875         | 159                     | 0.227    | 0.97 (0.93, 1.02) | 886,066                | 769           | 101                     | 0.634    | 1.02 (0.93, 1.12) |                   |
| 26.0-26.9              |                              | 2,058,583              | 3,004         | 161                     |          | 1.00 (Reference)  | 640,655                | 599           | 112                     | 0.080    | 1.09 (0.99, 1.21) |                   |
| 27.0-27.9              |                              | 1,404,135              | 2,205         | 204                     | 0.012    | 1.07 (1.02, 1.13) | 432,787                | 421           | 128                     | 0.033    | 1.13 (1.01, 1.26) |                   |
| 28.0-28.9              |                              | 850,515                | 1,329         | 219                     | 0.035    | 1.07 (1.01, 1.14) | 280,901                | 289           | 158                     | 0.012    | 1.18 (1.04, 1.34) |                   |
| 29.0-29.9              |                              | 530,710                | 984           | 231                     | <0.001   | 1.28 (1.19, 1.37) | 174,651                | 197           | 136                     | 0.002    | 1.28 (1.1, 1.48)  |                   |
| 30.0-31.4              |                              | 386,250                | 735           | 176                     | <0.001   | 1.31 (1.21, 1.42) | 144,963                | 179           | 87                      | <0.001   | 1.40 (1.19, 1.64) |                   |
| 31.5-32.9              |                              | 139,966                | 282           | 225                     | <0.001   | 1.39 (1.23, 1.57) | 79,253                 | 97            | 88                      | 0.004    | 1.36 (1.1, 1.67)  |                   |
| 33.0-34.9              |                              | 62,250                 | 145           | 188                     | <0.001   | 1.61 (1.36, 1.9)  | 40,989                 | 53            | 176                     | 0.012    | 1.42 (1.08, 1.88) |                   |
| 35.0-50.0              |                              | 28,268                 | 83            | 245                     | <0.001   | 2.02 (1.63, 2.52) | 25,380                 | 39            | 97                      | 0.002    | 1.66 (1.21, 2.28) |                   |
| 45-54 years            |                              | <16                    | 8,709         | 204                     | 1,832    | <0.001            | 5.63 (4.9, 6.48)       | 8,349         | 65                      | 629      | <0.001            | 4.85 (3.79, 6.2)  |
|                        |                              | 16.0-17.4              | 62,422        | 834                     | 1,565    | <0.001            | 3.36 (3.12, 3.61)      | 58,145        | 192                     | 376      | <0.001            | 2.20 (1.9, 2.54)  |
|                        | 17.5-18.9                    | 311,100                | 2,873         | 1,079                   | <0.001   | 2.39 (2.28, 2.5)  | 301,786                | 671           | 328                     | <0.001   | 1.55 (1.42, 1.68) |                   |
|                        | 19.0-19.9                    | 530,168                | 3,848         | 869                     | <0.001   | 1.92 (1.85, 2.01) | 533,958                | 895           | 194                     | <0.001   | 1.18 (1.1, 1.28)  |                   |
|                        | 20.0-20.9                    | 900,615                | 5,613         | 785                     | <0.001   | 1.68 (1.62, 1.74) | 999,159                | 1,611         | 220                     | <0.001   | 1.14 (1.07, 1.21) |                   |
|                        | 21.0-21.9                    | 1,354,006              | 7,056         | 633                     | <0.001   | 1.42 (1.37, 1.48) | 1,468,359              | 2,154         | 189                     | 0.392    | 1.02 (0.97, 1.08) |                   |
|                        | 22.0-22.9                    | 1,795,474              | 8,006         | 573                     | <0.001   | 1.24 (1.2, 1.28)  | 1,841,059              | 2,612         | 181                     | 0.350    | 0.97 (0.92, 1.03) |                   |
|                        | 23.0-23.9                    | 2,173,485              | 8,655         | 517                     | <0.001   | 1.12 (1.08, 1.16) | 1,903,245              | 2,812         | 216                     | 0.901    | 1.00 (0.95, 1.05) |                   |
|                        | 24.0-24.9                    | 2,306,735              | 8,606         | 480                     | 0.002    | 1.05 (1.02, 1.09) | 1,879,993              | 2,837         | 190                     |          | 1.00 (Reference)  |                   |
|                        | 25.0-25.9                    | 2,030,896              | 7,234         | 478                     | 0.436    | 1.01 (0.98, 1.05) | 1,393,876              | 2,170         | 201                     | 0.662    | 1.01 (0.96, 1.07) |                   |
|                        | 26.0-26.9                    | 1,527,239              | 5,358         | 503                     |          | 1.00 (Reference)  | 1,083,768              | 1,697         | 196                     | 0.869    | 1.01 (0.95, 1.07) |                   |
|                        | 27.0-27.9                    | 1,032,349              | 3,839         | 458                     | 0.010    | 1.06 (1.01, 1.1)  | 759,137                | 1,294         | 208                     | 0.026    | 1.08 (1.01, 1.15) |                   |
|                        | 28.0-28.9                    | 594,043                | 2,283         | 468                     | <0.001   | 1.09 (1.04, 1.15) | 504,377                | 915           | 176                     | 0.001    | 1.13 (1.05, 1.22) |                   |
|                        | 29.0-29.9                    | 352,384                | 1,459         | 564                     | <0.001   | 1.17 (1.11, 1.24) | 309,925                | 613           | 235                     | <0.001   | 1.22 (1.12, 1.33) |                   |
|                        | 30.0-31.4                    | 237,836                | 1,071         | 588                     | <0.001   | 1.27 (1.18, 1.35) | 256,386                | 528           | 207                     | <0.001   | 1.26 (1.15, 1.38) |                   |

| Table S2               |                              | Men (n=7,300,575)      |               |                         |                   |                   | Women (n=5,532,062)    |               |                         |                   |                   |                   |
|------------------------|------------------------------|------------------------|---------------|-------------------------|-------------------|-------------------|------------------------|---------------|-------------------------|-------------------|-------------------|-------------------|
| Age group <sup>c</sup> | BMI <sup>d</sup> at baseline | Follow-up person-years | No. of deaths | Death rate <sup>a</sup> | p- value          | HR (95% CI)       | Follow-up person-years | No. of deaths | Death rate <sup>a</sup> | p- value          | HR (95% CI)       |                   |
| 55-64 years            | 31.5-32.9                    | 79,446                 | 383           | 658                     | <0.001            | 1.34 (1.21, 1.48) | 134,351                | 305           | 259                     | <0.001            | 1.37 (1.22, 1.54) |                   |
|                        | 33.0-34.9                    | 30,475                 | 163           | 459                     | <0.001            | 1.48 (1.26, 1.73) | 63,380                 | 152           | 291                     | <0.001            | 1.43 (1.22, 1.69) |                   |
|                        | 35.0-50.0                    | 12,379                 | 73            | 494                     | <0.001            | 1.60 (1.27, 2.02) | 38,662                 | 113           | 227                     | <0.001            | 1.73 (1.43, 2.09) |                   |
|                        | <16                          | 11,312                 | 653           | 7,425                   | <0.001            | 4.97 (4.59, 5.38) | 10,665                 | 197           | 2,246                   | <0.001            | 3.89 (3.38, 4.49) |                   |
|                        | 16.0-17.4                    | 65,634                 | 2,338         | 3,682                   | <0.001            | 3.15 (3, 3.29)    | 52,912                 | 565           | 1,248                   | <0.001            | 2.33 (2.14, 2.54) |                   |
|                        | 17.5-18.9                    | 273,525                | 6,641         | 3,154                   | <0.001            | 2.21 (2.14, 2.28) | 199,801                | 1,602         | 1,078                   | <0.001            | 1.81 (1.71, 1.91) |                   |
|                        | 19.0-19.9                    | 412,578                | 7,927         | 2,660                   | <0.001            | 1.81 (1.76, 1.87) | 300,241                | 1,861         | 986                     | <0.001            | 1.44 (1.37, 1.52) |                   |
|                        | 20.0-20.9                    | 647,697                | 10,824        | 2,114                   | <0.001            | 1.61 (1.56, 1.66) | 525,391                | 2,803         | 801                     | <0.001            | 1.26 (1.2, 1.32)  |                   |
|                        | 21.0-21.9                    | 915,628                | 12,923        | 2,072                   | <0.001            | 1.39 (1.36, 1.43) | 796,671                | 3,876         | 761                     | <0.001            | 1.16 (1.11, 1.2)  |                   |
|                        | 22.0-22.9                    | 1,167,101              | 14,467        | 1,718                   | <0.001            | 1.25 (1.22, 1.29) | 1,102,036              | 4,962         | 699                     | <0.001            | 1.07 (1.03, 1.11) |                   |
|                        | 23.0-23.9                    | 1,351,550              | 14,831        | 1,664                   | <0.001            | 1.13 (1.1, 1.16)  | 1,242,260              | 5,306         | 663                     | 0.585             | 1.01 (0.97, 1.05) |                   |
|                        | 24.0-24.9                    | 1,385,296              | 13,937        | 1,471                   | 0.001             | 1.05 (1.02, 1.08) | 1,403,060              | 5,971         | 647                     |                   | 1.00 (Reference)  |                   |
|                        | 25.0-25.9                    | 1,167,303              | 11,265        | 1,544                   | 0.219             | 1.02 (0.99, 1.05) | 1,138,743              | 4,867         | 645                     | 0.507             | 0.99 (0.95, 1.03) |                   |
|                        | 26.0-26.9                    | 864,333                | 8,162         | 1,294                   |                   | 1.00 (Reference)  | 965,343                | 4,245         | 659                     | 0.910             | 1.00 (0.96, 1.04) |                   |
|                        | 27.0-27.9                    | 581,879                | 5,455         | 1,454                   | 0.840             | 1.00 (0.96, 1.03) | 706,326                | 3,161         | 712                     | 0.842             | 1.00 (0.96, 1.05) |                   |
|                        | 28.0-28.9                    | 323,685                | 3,130         | 1,318                   | 0.202             | 1.03 (0.99, 1.07) | 491,230                | 2,392         | 828                     | 0.002             | 1.08 (1.03, 1.13) |                   |
|                        | 29.0-29.9                    | 184,532                | 1,878         | 1,622                   | 0.002             | 1.08 (1.03, 1.14) | 300,496                | 1,468         | 715                     | 0.021             | 1.07 (1.01, 1.13) |                   |
|                        | 30.0-31.4                    | 123,913                | 1,311         | 1,887                   | <0.001            | 1.11 (1.05, 1.18) | 242,188                | 1,342         | 889                     | <0.001            | 1.20 (1.13, 1.28) |                   |
|                        | 31.5-32.9                    | 41,330                 | 482           | 1,913                   | <0.001            | 1.22 (1.11, 1.33) | 123,444                | 785           | 808                     | <0.001            | 1.37 (1.27, 1.47) |                   |
|                        | 33.0-34.9                    | 15,165                 | 190           | 3,340                   | <0.001            | 1.31 (1.13, 1.51) | 53,682                 | 333           | 1,087                   | <0.001            | 1.33 (1.19, 1.48) |                   |
| 35.0-50.0              | 6,859                        | 98                     | 1,288         | <0.001                  | 1.47 (1.21, 1.8)  | 30,947            | 252                    | 1,174         | <0.001                  | 1.72 (1.52, 1.95) |                   |                   |
| 65-74 years            | <16                          | 14,175                 | 1,500         | 13,614                  | <0.001            | 3.52 (3.33, 3.72) | 17,107                 | 749           | 5,363                   | <0.001            | 2.53 (2.35, 2.72) |                   |
|                        | 16.0-17.4                    | 69,133                 | 5,120         | 10,000                  | <0.001            | 2.47 (2.39, 2.56) | 61,790                 | 1,923         | 4,515                   | <0.001            | 1.87 (1.78, 1.96) |                   |
|                        | 17.5-18.9                    | 221,974                | 12,231        | 8,570                   | <0.001            | 1.87 (1.82, 1.92) | 187,835                | 4,745         | 4,442                   | <0.001            | 1.58 (1.53, 1.64) |                   |
|                        | 19.0-19.9                    | 276,050                | 12,782        | 7,225                   | <0.001            | 1.60 (1.56, 1.65) | 236,796                | 5,153         | 3,427                   | <0.001            | 1.39 (1.34, 1.44) |                   |
|                        | 20.0-20.9                    | 383,908                | 15,462        | 6,100                   | <0.001            | 1.41 (1.37, 1.45) | 351,421                | 6,787         | 3,100                   | <0.001            | 1.25 (1.21, 1.29) |                   |
|                        | 21.0-21.9                    | 480,993                | 17,621        | 5,384                   | <0.001            | 1.31 (1.27, 1.34) | 480,779                | 8,544         | 2,722                   | <0.001            | 1.17 (1.14, 1.21) |                   |
|                        | 22.0-22.9                    | 549,603                | 18,255        | 5,388                   | <0.001            | 1.20 (1.17, 1.24) | 607,483                | 9,669         | 2,683                   | <0.001            | 1.06 (1.03, 1.09) |                   |
|                        | 23.0-23.9                    | 572,327                | 17,312        | 4,633                   | <0.001            | 1.11 (1.08, 1.14) | 628,008                | 9,762         | 2,845                   | 0.004             | 1.04 (1.01, 1.07) |                   |
|                        | 24.0-24.9                    | 548,903                | 15,370        | 4,692                   | 0.012             | 1.04 (1.01, 1.06) | 690,923                | 10,254        | 2,609                   |                   | 1.00 (Reference)  |                   |
|                        | 25.0-25.9                    | 418,833                | 11,081        | 4,659                   | 0.570             | 0.99 (0.96, 1.02) | 566,757                | 8,280         | 2,748                   | 0.346             | 0.99 (0.96, 1.02) |                   |
|                        | 26.0-26.9                    | 298,652                | 7,900         | 4,699                   |                   | 1.00 (Reference)  | 488,779                | 7,119         | 2,632                   | 0.258             | 0.98 (0.95, 1.01) |                   |
|                        | 27.0-27.9                    | 190,393                | 4,832         | 5,516                   | 0.037             | 0.96 (0.93, 1)    | 363,661                | 5,351         | 2,954                   | 0.686             | 0.99 (0.96, 1.03) |                   |
|                        | 28.0-28.9                    | 102,882                | 2,708         | 4,613                   | 0.930             | 1.00 (0.96, 1.04) | 256,856                | 3,876         | 2,995                   | 0.513             | 1.01 (0.98, 1.05) |                   |
|                        | 29.0-29.9                    | 56,581                 | 1,571         | 5,239                   | 0.018             | 1.07 (1.01, 1.13) | 160,586                | 2,549         | 2,783                   | 0.004             | 1.07 (1.02, 1.11) |                   |
|                        | 30.0-31.4                    | 37,637                 | 1,038         | 4,007                   | 0.055             | 1.07 (1, 1.14)    | 126,956                | 2,038         | 2,622                   | 0.002             | 1.08 (1.03, 1.13) |                   |
|                        | 31.5-32.9                    | 11,882                 | 363           | 3,163                   | 0.004             | 1.17 (1.05, 1.3)  | 62,116                 | 1,049         | 3,452                   | <0.001            | 1.14 (1.07, 1.21) |                   |
|                        | 33.0-34.9                    | 4,798                  | 170           | 16,884                  | 0.001             | 1.31 (1.12, 1.52) | 26,823                 | 480           | 3,584                   | <0.001            | 1.19 (1.09, 1.3)  |                   |
|                        | 35.0-50.0                    | 2,089                  | 75            | 4,235                   | 0.007             | 1.37 (1.09, 1.71) | 14,343                 | 289           | 1,776                   | <0.001            | 1.35 (1.2, 1.52)  |                   |
|                        | 75-99 years                  | <16                    | 6,859         | 1,312                   | 19,382            | <0.001            | 2.71 (2.54, 2.9)       | 11,157        | 1,171                   | 9,758             | <0.001            | 1.92 (1.8, 2.04)  |
|                        |                              | 16.0-17.4              | 26,655        | 3,864                   | 14,438            | <0.001            | 1.98 (1.89, 2.08)      | 31,779        | 2,946                   | 8,530             | <0.001            | 1.70 (1.63, 1.78) |
| 17.5-18.9              |                              | 65,596                 | 7,884         | 11,927                  | <0.001            | 1.62 (1.55, 1.69) | 79,507                 | 6,240         | 7,200                   | <0.001            | 1.46 (1.41, 1.51) |                   |
| 19.0-19.9              |                              | 71,648                 | 7,591         | 10,550                  | <0.001            | 1.44 (1.38, 1.5)  | 83,983                 | 5,979         | 6,620                   | <0.001            | 1.35 (1.31, 1.4)  |                   |
| 20.0-20.9              |                              | 88,792                 | 8,827         | 9,827                   | <0.001            | 1.34 (1.29, 1.4)  | 107,818                | 6,915         | 5,962                   | <0.001            | 1.23 (1.19, 1.27) |                   |
| 21.0-21.9              |                              | 102,168                | 9,288         | 8,992                   | <0.001            | 1.23 (1.18, 1.29) | 130,968                | 7,919         | 5,715                   | <0.001            | 1.17 (1.13, 1.21) |                   |
| 22.0-22.9              |                              | 102,168                | 8,700         | 8,411                   | <0.001            | 1.15 (1.11, 1.2)  | 145,342                | 8,191         | 5,377                   | <0.001            | 1.10 (1.07, 1.14) |                   |
| 23.0-23.9              |                              | 98,527                 | 7,965         | 8,018                   | <0.001            | 1.10 (1.05, 1.15) | 130,836                | 7,116         | 5,232                   | <0.001            | 1.07 (1.04, 1.11) |                   |
| 24.0-24.9              |                              | 84,422                 | 6,437         | 7,530                   | 0.135             | 1.03 (0.99, 1.08) | 127,572                | 6,370         | 4,877                   |                   | 1.00 (Reference)  |                   |
| 25.0-25.9              |                              | 60,559                 | 4,478         | 7,288                   | 0.917             | 1.00 (0.96, 1.05) | 102,574                | 5,097         | 4,840                   | 0.734             | 0.99 (0.96, 1.03) |                   |
| 26.0-26.9              |                              | 40,678                 | 2,977         | 7,223                   |                   | 1.00 (Reference)  | 81,209                 | 3,986         | 4,817                   | 0.820             | 1.00 (0.96, 1.04) |                   |
| 27.0-27.9              |                              | 24,549                 | 1,753         | 7,131                   | 0.432             | 0.98 (0.92, 1.04) | 57,644                 | 2,839         | 4,853                   | 0.977             | 1.00 (0.96, 1.04) |                   |
| 28.0-28.9              |                              | 13,513                 | 967           | 7,048                   | 0.341             | 0.97 (0.9, 1.04)  | 40,164                 | 2,016         | 4,939                   | 0.391             | 1.02 (0.97, 1.07) |                   |
| 29.0-29.9              | 7,303                        | 490                    | 6,486         | 0.019                   | 0.89 (0.81, 0.98) | 25,767            | 1,244                  | 4,777         | 0.654                   | 0.99 (0.93, 1.05) |                   |                   |

| Table S2               |                              | Men (n=7,300,575)      |               |                         |          |                   | Women (n=5,532,062)    |               |                         |                   |                   |
|------------------------|------------------------------|------------------------|---------------|-------------------------|----------|-------------------|------------------------|---------------|-------------------------|-------------------|-------------------|
| Age group <sup>c</sup> | BMI <sup>d</sup> at baseline | Follow-up person-years | No. of deaths | Death rate <sup>a</sup> | p- value | HR (95% CI)       | Follow-up person-years | No. of deaths | Death rate <sup>a</sup> | p- value          | HR (95% CI)       |
| 45-49 years            | 30.0-31.4                    | 4,564                  | 333           | 7,135                   | 0.776    | 0.98 (0.88, 1.1)  | 18,765                 | 994           | 5,267                   | 0.072             | 1.06 (0.99, 1.14) |
|                        | 31.5-32.9                    | 1,882                  | 139           | 7,432                   | 0.957    | 1.00 (0.84, 1.18) | 9,316                  | 466           | 5,017                   | 0.470             | 1.04 (0.94, 1.14) |
|                        | 33.0-34.9                    | 463                    | 38            | 8,323                   | 0.590    | 1.09 (0.79, 1.5)  | 3,728                  | 205           | 5,307                   | 0.115             | 1.12 (0.97, 1.29) |
|                        | 35.0-50.0                    | 331                    | 32            | 9,505                   | 0.107    | 1.33 (0.94, 1.89) | 2,317                  | 111           | 4,657                   | 0.420             | 0.93 (0.77, 1.12) |
|                        | <16                          |                        |               |                         |          |                   | 3,922                  | 26            | 467                     | <0.001            | 5.37 (3.64, 7.92) |
|                        | 16.0-17.4                    |                        |               |                         |          |                   | 31,227                 | 72            | 386                     | <0.001            | 1.93 (1.52, 2.45) |
|                        | 17.5-18.9                    |                        |               |                         |          |                   | 174,746                | 272           | 118                     | <0.001            | 1.34 (1.17, 1.53) |
|                        | 19.0-19.9                    |                        |               |                         |          |                   | 312,532                | 385           | 95                      | 0.250             | 1.07 (0.95, 1.2)  |
|                        | 20.0-20.9                    |                        |               |                         |          |                   | 575,640                | 671           | 128                     | 0.727             | 1.02 (0.92, 1.12) |
|                        | 21.0-21.9                    |                        |               |                         |          |                   | 810,451                | 934           | 125                     | 0.931             | 1.00 (0.92, 1.1)  |
|                        | 22.0-22.9                    |                        |               |                         |          |                   | 963,293                | 1,113         | 153                     | 0.909             | 1.00 (0.92, 1.09) |
|                        | 23.0-23.9                    |                        |               |                         |          |                   | 945,524                | 1,098         | 123                     | 0.893             | 1.01 (0.92, 1.09) |
|                        | 24.0-24.9                    |                        |               |                         |          |                   | 890,253                | 1,036         | 151                     |                   | 1.00 (Reference)  |
|                        | 25.0-25.9                    |                        |               |                         |          |                   | 631,111                | 774           | 167                     | 0.366             | 1.04 (0.95, 1.15) |
| 50-64 years            | 26.0-26.9                    |                        |               |                         |          |                   | 478,256                | 635           | 173                     | 0.022             | 1.12 (1.02, 1.24) |
|                        | 27.0-27.9                    |                        |               |                         |          |                   | 327,245                | 454           | 197                     | 0.007             | 1.16 (1.04, 1.3)  |
|                        | 28.0-28.9                    |                        |               |                         |          |                   | 215,863                | 294           | 183                     | 0.069             | 1.13 (0.99, 1.28) |
|                        | 29.0-29.9                    |                        |               |                         |          |                   | 132,363                | 217           | 170                     | <0.001            | 1.35 (1.16, 1.56) |
|                        | 30.0-31.4                    |                        |               |                         |          |                   | 110,659                | 195           | 134                     | <0.001            | 1.43 (1.23, 1.67) |
|                        | 31.5-32.9                    |                        |               |                         |          |                   | 58,599                 | 99            | 132                     | 0.005             | 1.35 (1.09, 1.65) |
|                        | 33.0-34.9                    |                        |               |                         |          |                   | 29,010                 | 50            | 124                     | 0.041             | 1.34 (1.01, 1.79) |
|                        | 35.0-50.0                    |                        |               |                         |          |                   | 17,649                 | 38            | 158                     | 0.002             | 1.65 (1.19, 2.28) |
|                        | <16                          |                        |               |                         |          |                   | 15,092                 | 236           | 1,939                   | <0.001            | 3.99 (3.51, 4.54) |
|                        | 16.0-17.4                    |                        |               |                         |          |                   | 79,830                 | 685           | 1,074                   | <0.001            | 2.34 (2.16, 2.53) |
|                        | 17.5-18.9                    |                        |               |                         |          |                   | 326,842                | 2,001         | 912                     | <0.001            | 1.79 (1.71, 1.89) |
|                        | 19.0-19.9                    |                        |               |                         |          |                   | 521,667                | 2,371         | 831                     | <0.001            | 1.41 (1.34, 1.47) |
|                        | 20.0-20.9                    |                        |               |                         |          |                   | 948,911                | 3,743         | 687                     | <0.001            | 1.26 (1.21, 1.31) |
|                        | 21.0-21.9                    |                        |               |                         |          |                   | 1,454,580              | 5,096         | 645                     | <0.001            | 1.13 (1.09, 1.17) |
| 22.0-22.9              |                              |                        |               |                         |          | 1,979,803         | 6,461                  | 597           | 0.015                   | 1.04 (1.01, 1.08) |                   |
| 23.0-23.9              |                              |                        |               |                         |          | 2,199,980         | 7,020                  | 567           | 0.688                   | 1.01 (0.97, 1.04) |                   |
| 24.0-24.9              |                              |                        |               |                         |          | 2,392,800         | 7,772                  | 558           |                         | 1.00 (Reference)  |                   |
| 25.0-25.9              |                              |                        |               |                         |          | 1,901,508         | 6,263                  | 553           | 0.512                   | 0.99 (0.96, 1.02) |                   |
| 26.0-26.9              |                              |                        |               |                         |          | 1,570,855         | 5,307                  | 566           | 0.563                   | 0.99 (0.96, 1.02) |                   |
| 27.0-27.9              |                              |                        |               |                         |          | 1,138,218         | 4,001                  | 610           | 0.599                   | 1.01 (0.97, 1.05) |                   |
| 28.0-28.9              |                              |                        |               |                         |          | 779,744           | 3,013                  | 713           | <0.001                  | 1.09 (1.04, 1.14) |                   |
| 29.0-29.9              |                              |                        |               |                         |          | 478,058           | 1,864                  | 624           | 0.001                   | 1.09 (1.03, 1.14) |                   |
| 30.0-31.4              |                              |                        |               |                         |          | 387,916           | 1,675                  | 755           | <0.001                  | 1.20 (1.14, 1.26) |                   |
| 31.5-32.9              |                              |                        |               |                         |          | 199,197           | 991                    | 695           | <0.001                  | 1.37 (1.28, 1.46) |                   |
| 33.0-34.9              |                              |                        |               |                         |          | 88,051            | 435                    | 931           | <0.001                  | 1.36 (1.24, 1.5)  |                   |
| 35.0-50.0              |                              |                        |               |                         |          | 51,959            | 327                    | 1,019         | <0.001                  | 1.74 (1.55, 1.94) |                   |

BMI, body mass index; CI, confidence interval; HR, hazard ratio.

<sup>a</sup> Uniformly age-standardized death rate per 100,000 person-years (namely, the simple mean of calculable age-specific rates in the 14 age-specific rates at ages 18-24 years, 25-29 years, and up to 85 years or older, increasing by 5 years per group, based on **age attained** during follow-up) was calculated for each BMI category. Several age-specific rates were calculated at each age group. The age-specific rate in the oldest ages at each age group can be very high due to small number of follow-up years.

Therefore, death rate at a BMI category can be very high compared to other categories.

<sup>b</sup> Hazard ratios were calculated using Cox proportional hazards models after adjustment for age at enrollment (continuous variable), smoking status (current smoker, former smoker, never-smoker, and those with missing smoking status), and known pre-existing illness either cured or not (yes, and no including those with missing information).

<sup>c</sup> Age groups at 18-34 years, 35-44 years, 45-54 years, 55-64 years, 45-64 years, 65-74 years, and 75-99 years as well as **45-49 years and 50-64 years (only in women)**.

<sup>d</sup> 18 categories.

**Table S3. Apparent optimal<sup>a</sup> and acceptable<sup>a</sup> ranges of body mass index<sup>b</sup> for longevity in never-smokers.**

| Age (years) | Men           |              | Age (years) | Women                  |                        |
|-------------|---------------|--------------|-------------|------------------------|------------------------|
|             | Optimal range | Normal range |             | Optimal range          | Normal range           |
| 18-34       | 22.0-25.9     | 20.0-27.9    | 18-34       | 15.5-24.9 <sup>c</sup> | 15.5-24.9 <sup>c</sup> |
| 35-44       | 23.0-25.9     | 22.0-27.9    | 35-44       | 19.0-23.9              | 17.5-25.9              |
| 45-54       | 24.0-26.9     | 23.0-27.9    | 45-49       | 20.0-25.9              | 19.0-26.9              |
|             |               |              | 50-54       | 22.0-27.9              | 21.0-28.9              |
| 55-64       | 24.0-27.9     | 23.0-31.4    | 55-64       | 23.0-27.9              | 22.0-29.9              |
| 65-74       | 25.0-28.9     | 23.0-31.4    | 65-74       | 24.0-28.9              | 22.0-31.4              |
| 75-99       | 25.0-34.9     | 24.0-34.9    | 75-99       | 24.0-29.9              | 22.0-36.4 <sup>d</sup> |

<sup>a</sup> Generally, the ranges with an excess risk below 5%, relative to the lowest potential risk (the lowest unweighted geometric mean of hazard ratios at three consecutive body-mass index categories), were considered the optimal ranges, while the ranges with an excess risk below 15%, relative to the potential lowest risk, were deemed the acceptable ranges for each sex-age group. For example, in lifetime non-smoking men aged 18-34 years, the potential lowest risk were 0.91 (the geometric mean of hazard ratios at BMI of 23-23.9 [hazard ratio=0.95], 24-24.9 [0.92], and 25-25.9 [0.86]; Figure S5). The relative hazard at 26-26.9 kg/m<sup>2</sup> (hazard ratio=1.0) was 1.10 (1.0/0.91), and the excess risk was 10%. Thus, in lifetime non-smoking men aged 18-34 years, BMI of 26-26.9 kg/m<sup>2</sup> was considered the acceptable range.

<sup>b</sup> Body mass index (weight in kilograms divided by the square of the height in meters; kg/m<sup>2</sup>). Weight and height were measured while examinees wore light clothing without shoes.

<sup>c</sup> The lower end (15.5) of the range is the median of body mass index in the lowest body mass index category (<16) among all participants.

<sup>d</sup> The higher end (36.4) of the range is the median of body mass index in the highest body mass index category (35.0-50.0) among all participants.

**Table S4. Death rate<sup>a</sup> and hazard ratio<sup>b</sup> of death associated with 11 categories<sup>c</sup> of body mass index according to smoking status and age<sup>d</sup> in men among all participants (n=7,300,575).**

| Men                    |                              | Never-smokers (n=2,523,287) |               |                         |                   |                   | Current smokers (n=3,483,108) |               |                         |                   |                   | Former smokers (n=1,017,048) |               |                         |                   |                   |
|------------------------|------------------------------|-----------------------------|---------------|-------------------------|-------------------|-------------------|-------------------------------|---------------|-------------------------|-------------------|-------------------|------------------------------|---------------|-------------------------|-------------------|-------------------|
| Age group <sup>d</sup> | BMI <sup>c</sup> at baseline | Follow-up person-years      | No. of deaths | Death rate <sup>a</sup> | p- value          | HR (95% CI)       | Follow-up person-years        | No. of deaths | Death rate <sup>a</sup> | p- value          | HR (95% CI)       | Follow-up person-years       | No. of deaths | Death rate <sup>a</sup> | p- value          | HR (95% CI)       |
| 18-44 years            | <17.5                        | 97,014                      | 180           | 216                     | <0.001            | 2.86 (2.45, 3.33) | 214,468                       | 453           | 518                     | <0.001            | 2.32 (2.1, 2.55)  | 24,838                       | 61            | 217                     | <0.001            | 3.57 (2.76, 4.63) |
|                        | 17.5-18.9                    | 447,519                     | 470           | 172                     | <0.001            | 1.61 (1.46, 1.79) | 1,006,885                     | 1,708         | 283                     | <0.001            | 1.86 (1.76, 1.96) | 135,687                      | 187           | 218                     | <0.001            | 2.00 (1.71, 2.35) |
|                        | 19.0-20.4                    | 1,226,626                   | 1,119         | 115                     | <0.001            | 1.34 (1.25, 1.45) | 2,538,245                     | 3,772         | 241                     | <0.001            | 1.55 (1.48, 1.62) | 418,985                      | 422           | 102                     | <0.001            | 1.40 (1.25, 1.57) |
|                        | 20.5-21.9                    | 2,116,478                   | 1,788         | 103                     | <0.001            | 1.16 (1.09, 1.24) | 3,933,733                     | 5,448         | 199                     | <0.001            | 1.35 (1.3, 1.41)  | 792,050                      | 666           | 100                     | 0.062             | 1.10 (1, 1.22)    |
|                        | 22.0-23.4                    | 2,667,382                   | 2,248         | 106                     | 0.024             | 1.07 (1.01, 1.14) | 4,557,707                     | 5,775         | 176                     | <0.001            | 1.16 (1.11, 1.2)  | 1,095,632                    | 908           | 99                      | 0.734             | 1.02 (0.93, 1.11) |
|                        | 23.5-24.9                    | 2,813,209                   | 2,338         | 91                      | 0.772             | 0.99 (0.93, 1.05) | 4,678,477                     | 5,596         | 160                     | 0.062             | 1.04 (1, 1.08)    | 1,251,368                    | 1,040         | 81                      | 0.458             | 0.97 (0.88, 1.06) |
|                        | 25.0-26.4                    | 2,151,137                   | 1,870         | 89                      |                   | 1.00 (Reference)  | 3,685,427                     | 4,341         | 145                     |                   | 1.00 (Reference)  | 1,010,654                    | 894           | 71                      |                   | 1.00 (Reference)  |
|                        | 26.5-27.9                    | 1,254,198                   | 1,186         | 95                      | 0.047             | 1.08 (1, 1.16)    | 2,243,601                     | 2,902         | 158                     | <0.001            | 1.09 (1.04, 1.15) | 595,584                      | 497           | 114                     | 0.233             | 0.94 (0.84, 1.04) |
|                        | 28.0-29.4                    | 675,915                     | 719           | 148                     | <0.001            | 1.24 (1.14, 1.35) | 1,284,181                     | 1,682         | 168                     | <0.001            | 1.15 (1.09, 1.21) | 316,892                      | 291           | 156                     | 0.477             | 1.05 (0.92, 1.2)  |
|                        | 29.5-30.9                    | 267,674                     | 286           | 120                     | <0.001            | 1.28 (1.13, 1.45) | 542,187                       | 810           | 141                     | <0.001            | 1.37 (1.27, 1.48) | 122,942                      | 134           | 108                     | 0.006             | 1.29 (1.07, 1.54) |
| 31.0-50.0              | 214,729                      | 272                         | 124           | <0.001                  | 1.68 (1.48, 1.9)  | 459,395           | 709                           | 194           | <0.001                  | 1.55 (1.43, 1.68) | 90,573            | 110                          | 210           | <0.001                  | 1.52 (1.25, 1.86) |                   |
| 45-64 years            | <17.5                        | 45,494                      | 1,082         | 2,665                   | <0.001            | 3.82 (3.59, 4.07) | 83,619                        | 2,431         | 3,179                   | <0.001            | 3.21 (3.07, 3.35) | 14,290                       | 386           | 2,965                   | <0.001            | 4.42 (3.98, 4.91) |
|                        | 17.5-18.9                    | 178,066                     | 2,257         | 1,890                   | <0.001            | 2.20 (2.1, 2.31)  | 324,833                       | 5,989         | 2,757                   | <0.001            | 2.20 (2.13, 2.27) | 61,664                       | 885           | 1,914                   | <0.001            | 2.61 (2.42, 2.8)  |
|                        | 19.0-20.4                    | 528,777                     | 5,002         | 1,532                   | <0.001            | 1.73 (1.67, 1.79) | 847,367                       | 11,762        | 2,203                   | <0.001            | 1.77 (1.72, 1.81) | 192,001                      | 1,797         | 1,312                   | <0.001            | 1.82 (1.72, 1.92) |
|                        | 20.5-21.9                    | 1,116,792                   | 8,363         | 1,300                   | <0.001            | 1.40 (1.36, 1.44) | 1,486,040                     | 16,207        | 1,876                   | <0.001            | 1.45 (1.42, 1.49) | 429,692                      | 3,137         | 1,281                   | <0.001            | 1.49 (1.43, 1.57) |
|                        | 22.0-23.4                    | 1,777,077                   | 11,039        | 1,005                   | <0.001            | 1.18 (1.15, 1.21) | 1,955,274                     | 17,219        | 1,639                   | <0.001            | 1.20 (1.18, 1.23) | 719,936                      | 4,156         | 1,148                   | <0.001            | 1.22 (1.16, 1.27) |
|                        | 23.5-24.9                    | 2,265,343                   | 12,338        | 977                     | 0.001             | 1.05 (1.02, 1.07) | 2,156,171                     | 15,996        | 1,446                   | <0.001            | 1.05 (1.02, 1.07) | 958,455                      | 4,889         | 930                     | <0.001            | 1.11 (1.06, 1.16) |
|                        | 25.0-26.4                    | 1,890,554                   | 9,760         | 955                     |                   | 1.00 (Reference)  | 1,647,209                     | 11,349        | 1,473                   |                   | 1.00 (Reference)  | 822,013                      | 3,718         | 1,005                   |                   | 1.00 (Reference)  |
|                        | 26.5-27.9                    | 1,147,102                   | 6,040         | 946                     | 0.379             | 1.01 (0.98, 1.05) | 956,809                       | 6,493         | 1,311                   | 0.808             | 1.00 (0.97, 1.03) | 493,459                      | 2,261         | 714                     | 0.766             | 1.01 (0.96, 1.06) |
|                        | 28.0-29.4                    | 554,684                     | 3,173         | 839                     | <0.001            | 1.11 (1.07, 1.15) | 457,612                       | 3,037         | 1,438                   | 0.687             | 0.99 (0.95, 1.03) | 235,112                      | 1,171         | 931                     | 0.001             | 1.11 (1.04, 1.19) |
|                        | 29.5-30.9                    | 194,076                     | 1,170         | 1,303                   | <0.001            | 1.16 (1.09, 1.23) | 160,904                       | 1,214         | 1,518                   | <0.001            | 1.12 (1.06, 1.19) | 80,416                       | 420           | 903                     | 0.005             | 1.16 (1.04, 1.28) |
| 31.0-50.0              | 111,835                      | 833                         | 1,954         | <0.001                  | 1.43 (1.33, 1.53) | 93,237            | 734                           | 2,159         | <0.001                  | 1.19 (1.1, 1.28)  | 45,151            | 250                          | 1,220         | 0.004                   | 1.21 (1.06, 1.37) |                   |
| 65-99 years            | <17.5                        | 45,495                      | 4,679         | 11,310                  | <0.001            | 2.69 (2.6, 2.78)  | 52,801                        | 5,172         | 11,927                  | <0.001            | 2.13 (2.05, 2.21) | 14,590                       | 1,533         | 11,266                  | <0.001            | 2.61 (2.46, 2.77) |
|                        | 17.5-18.9                    | 115,934                     | 7,899         | 8,185                   | <0.001            | 1.89 (1.83, 1.94) | 123,273                       | 8,776         | 9,149                   | <0.001            | 1.63 (1.57, 1.68) | 39,026                       | 2,765         | 8,456                   | <0.001            | 1.91 (1.82, 2.01) |
|                        | 19.0-20.4                    | 243,663                     | 12,968        | 6,650                   | <0.001            | 1.54 (1.5, 1.58)  | 222,406                       | 13,257        | 8,229                   | <0.001            | 1.41 (1.37, 1.46) | 80,255                       | 4,606         | 7,212                   | <0.001            | 1.61 (1.55, 1.69) |
|                        | 20.5-21.9                    | 395,061                     | 17,465        | 5,918                   | <0.001            | 1.34 (1.31, 1.37) | 286,769                       | 14,794        | 7,387                   | <0.001            | 1.24 (1.21, 1.28) | 127,388                      | 5,833         | 6,220                   | <0.001            | 1.35 (1.29, 1.4)  |
|                        | 22.0-23.4                    | 502,411                     | 18,721        | 5,332                   | <0.001            | 1.18 (1.15, 1.2)  | 286,616                       | 13,205        | 6,859                   | <0.001            | 1.14 (1.11, 1.18) | 161,037                      | 6,293         | 5,466                   | <0.001            | 1.18 (1.13, 1.23) |
|                        | 23.5-24.9                    | 524,799                     | 17,152        | 4,947                   | <0.001            | 1.06 (1.04, 1.09) | 243,138                       | 10,188        | 6,526                   | 0.001             | 1.06 (1.02, 1.09) | 166,545                      | 5,604         | 5,067                   | 0.036             | 1.05 (1, 1.09)    |
|                        | 25.0-26.4                    | 375,446                     | 11,266        | 4,648                   |                   | 1.00 (Reference)  | 148,584                       | 5,756         | 6,200                   |                   | 1.00 (Reference)  | 116,283                      | 3,663         | 4,918                   |                   | 1.00 (Reference)  |
|                        | 26.5-27.9                    | 216,765                     | 6,157         | 4,463                   | 0.008             | 0.96 (0.93, 0.99) | 75,291                        | 2,848         | 6,620                   | 0.748             | 0.99 (0.95, 1.04) | 62,481                       | 1,952         | 5,067                   | 0.650             | 1.01 (0.96, 1.07) |
|                        | 28.0-29.4                    | 94,192                      | 2,792         | 4,599                   | 0.781             | 1.01 (0.97, 1.05) | 31,490                        | 1,229         | 6,093                   | 0.892             | 1.00 (0.94, 1.07) | 27,111                       | 809           | 4,722                   | 0.577             | 0.98 (0.91, 1.06) |
|                        | 29.5-30.9                    | 33,590                      | 979           | 4,584                   | 0.976             | 1.00 (0.94, 1.07) | 10,799                        | 455           | 6,493                   | 0.035             | 1.11 (1.01, 1.22) | 8,722                        | 291           | 4,876                   | 0.194             | 1.08 (0.96, 1.22) |
| 31.0-50.0              | 17,660                       | 579                         | 4,873         | 0.033                   | 1.10 (1.01, 1.19) | 5,866             | 269                           | 7,371         | 0.002                   | 1.21 (1.07, 1.37) | 4,787             | 181                          | 6,720         | 0.011                   | 1.21 (1.05, 1.41) |                   |



BMI, body mass index; CI, confidence interval; HR, hazard ratio.

<sup>a</sup> Uniformly age-standardized death rate per 100,000 person-years (namely, the simple mean of calculable age-specific rates in the 14 age-specific rates at ages 18-24 years, 25-29 years, and up to 85 years or older, increasing by 5 years per group, based on age attained during follow-up) was calculated for each BMI category. Several age-specific rates were calculated at each age group. The age-specific rate in the oldest ages at each age group can be very high due to small number of follow-up years. Therefore, death rate at a BMI category can be very high compared to other categories.

<sup>b</sup> Hazard ratios were calculated using Cox proportional hazards models after adjustment for age at enrollment (continuous variable), smoking status (current smoker, former smoker, never-smoker, and those with missing smoking status), and known pre-existing illness either cured or not (yes, and no including those with missing information).

<sup>c</sup> Due to relatively small numbers in some subgroups, analysis of 11 categories produced more stable results than analysis of 18 categories.

<sup>d</sup> Age groups at 18-44 years, 45-64 years, and 65-99 years.

<sup>e</sup> 11 categories.

**Table S5. Death rate<sup>a</sup> and hazard ratio<sup>b</sup> of death associated with seven categories<sup>c</sup> of body mass index according to smoking status and age<sup>d</sup> in women among all participants (n=5,532,062).**

| Women                  |                              | Never-smokers (n=4,913,461) |               |                         |          |                   | Current smokers (n=174,358) |               |                         |          |                   | Former smokers (n=83,602) |               |                         |          |                   |
|------------------------|------------------------------|-----------------------------|---------------|-------------------------|----------|-------------------|-----------------------------|---------------|-------------------------|----------|-------------------|---------------------------|---------------|-------------------------|----------|-------------------|
| Age group <sup>d</sup> | BMI <sup>e</sup> at baseline | Follow-up person-years      | No. of deaths | Death rate <sup>a</sup> | p- value | HR (95% CI)       | Follow-up person-years      | No. of deaths | Death rate <sup>a</sup> | p- value | HR (95% CI)       | Follow-up person-years    | No. of deaths | Death rate <sup>a</sup> | p- value | HR (95% CI)       |
| 18-44 years            | <18.5                        | 2,690,817                   | 1,027         | 91                      | <0.001   | 1.15 (1.06, 1.24) | 105,778                     | 84            | 126                     | 0.049    | 1.32 (1, 1.75)    | 68,675                    | 35            | 713                     | 0.776    | 0.94 (0.62, 1.43) |
|                        | 18.5-21.0                    | 8,250,742                   | 3,373         | 61                      | 0.424    | 0.98 (0.93, 1.03) | 286,289                     | 244           | 125                     | 0.283    | 1.12 (0.91, 1.39) | 194,253                   | 96            | 67                      | 0.066    | 0.75 (0.55, 1.02) |
|                        | 21.0-23.0                    | 6,374,466                   | 3,326         | 62                      | 0.763    | 0.99 (0.94, 1.05) | 204,162                     | 230           | 208                     | 0.080    | 1.21 (0.98, 1.49) | 133,939                   | 76            | 58                      | 0.023    | 0.69 (0.5, 0.95)  |
|                        | 23.0-25.0                    | 4,068,072                   | 2,428         | 64                      |          | 1.00 (Reference)  | 128,910                     | 136           | 117                     |          | 1.00 (Reference)  | 77,831                    | 74            | 152                     |          | 1.00 (Reference)  |
|                        | 25.0-27.5                    | 2,222,608                   | 1,617         | 79                      | <0.001   | 1.15 (1.08, 1.22) | 76,815                      | 95            | 97                      | 0.405    | 1.12 (0.86, 1.45) | 44,430                    | 33            | 64                      | 0.143    | 0.74 (0.49, 1.11) |
|                        | 27.5-30.0                    | 801,828                     | 669           | 100                     | <0.001   | 1.30 (1.19, 1.41) | 35,622                      | 60            | 317                     | 0.005    | 1.55 (1.14, 2.1)  | 17,056                    | 10            | 54                      | 0.122    | 0.59 (0.31, 1.15) |
|                        | 30.0-50.0                    | 394,609                     | 380           | 77                      | <0.001   | 1.56 (1.4, 1.74)  | 23,590                      | 27            | 104                     | 0.408    | 1.19 (0.79, 1.8)  | 11,304                    | 10            | 80                      | 0.987    | 0.99 (0.51, 1.93) |
| 45-64 years            | <18.5                        | 339,861                     | 1,874         | 725                     | <0.001   | 2.13 (2.03, 2.23) | 19,698                      | 242           | 2,230                   | <0.001   | 1.97 (1.71, 2.28) | 4,283                     | 26            | 759                     | 0.011    | 1.70 (1.13, 2.55) |
|                        | 18.5-21.0                    | 2,321,703                   | 6,923         | 649                     | <0.001   | 1.30 (1.26, 1.34) | 87,329                      | 563           | 944                     | <0.001   | 1.26 (1.13, 1.4)  | 27,440                    | 115           | 1,021                   | 0.003    | 1.41 (1.12, 1.77) |
|                        | 21.0-23.0                    | 4,682,239                   | 11,776        | 536                     | <0.001   | 1.07 (1.04, 1.1)  | 134,964                     | 732           | 730                     | 0.383    | 1.05 (0.95, 1.16) | 52,527                    | 145           | 327                     | 0.316    | 0.90 (0.73, 1.11) |
|                        | 23.0-25.0                    | 5,795,365                   | 14,720        | 471                     |          | 1.00 (Reference)  | 144,364                     | 789           | 933                     |          | 1.00 (Reference)  | 62,240                    | 212           | 801                     |          | 1.00 (Reference)  |
|                        | 25.0-27.5                    | 4,872,732                   | 13,531        | 487                     | 0.907    | 1.00 (0.98, 1.03) | 119,289                     | 625           | 1,370                   | 0.024    | 0.89 (0.8, 0.98)  | 50,966                    | 199           | 785                     | 0.653    | 1.05 (0.86, 1.27) |
|                        | 27.5-30.0                    | 2,019,738                   | 6,521         | 561                     | <0.001   | 1.10 (1.07, 1.13) | 55,420                      | 298           | 1,120                   | 0.075    | 0.89 (0.78, 1.01) | 22,359                    | 79            | 379                     | 0.240    | 0.86 (0.66, 1.11) |
|                        | 30.0-50.0                    | 842,428                     | 3,311         | 635                     | <0.001   | 1.32 (1.27, 1.37) | 27,968                      | 191           | 1,046                   | 0.128    | 1.13 (0.97, 1.32) | 9,741                     | 47            | 522                     | 0.230    | 1.21 (0.88, 1.67) |
| 65-99 years            | <18.5                        | 217,824                     | 10,069        | 5,227                   | <0.001   | 1.70 (1.66, 1.74) | 34,707                      | 2,253         | 6,618                   | <0.001   | 1.48 (1.39, 1.56) | 4,969                     | 336           | 6,442                   | <0.001   | 1.66 (1.45, 1.89) |
|                        | 18.5-21.0                    | 759,084                     | 23,332        | 3,983                   | <0.001   | 1.28 (1.26, 1.31) | 70,609                      | 3,456         | 5,323                   | <0.001   | 1.18 (1.12, 1.24) | 14,347                    | 695           | 5,275                   | <0.001   | 1.37 (1.24, 1.53) |
|                        | 21.0-23.0                    | 1,189,940                   | 28,674        | 3,456                   | <0.001   | 1.10 (1.08, 1.12) | 73,820                      | 2,985         | 4,785                   | 0.235    | 1.03 (0.98, 1.09) | 19,366                    | 672           | 4,080                   | 0.649    | 1.03 (0.92, 1.14) |
|                        | 23.0-25.0                    | 1,395,544                   | 28,368        | 3,174                   |          | 1.00 (Reference)  | 64,598                      | 2,402         | 4,648                   |          | 1.00 (Reference)  | 20,750                    | 669           | 3,877                   |          | 1.00 (Reference)  |
|                        | 25.0-27.5                    | 1,319,927                   | 24,969        | 3,060                   | <0.001   | 0.96 (0.94, 0.98) | 50,198                      | 1,697         | 4,405                   | 0.035    | 0.94 (0.88, 1)    | 18,548                    | 538           | 4,082                   | 0.886    | 0.99 (0.89, 1.11) |
|                        | 27.5-30.0                    | 596,681                     | 11,537        | 3,174                   | 0.673    | 1.00 (0.97, 1.02) | 19,141                      | 667           | 4,606                   | 0.660    | 0.98 (0.9, 1.07)  | 8,035                     | 226           | 3,701                   | 0.726    | 0.97 (0.84, 1.13) |
|                        | 30.0-50.0                    | 236,826                     | 4,888         | 3,350                   | <0.001   | 1.07 (1.04, 1.11) | 7,574                       | 231           | 4,397                   | 0.072    | 0.88 (0.77, 1.01) | 3,297                     | 114           | 4,425                   | 0.105    | 1.18 (0.97, 1.44) |

BMI, body mass index; CI, confidence interval; HR, hazard ratio.

<sup>a</sup> Uniformly age-standardized death rate per 100,000 person-years (namely, the simple mean of calculable age-specific rates in the 14 age-specific rates at ages 18-24 years, 25-29 years, and up to 85 years or older, increasing by 5 years per group, based on age attained during follow-up) was calculated for each BMI category. Several age-specific rates were calculated at each age group. The age-specific rate in the oldest ages at each age group can be very high due to small number of follow-up years. Therefore, death rate at a BMI category can be very high compared to other categories.

<sup>b</sup> Hazard ratios were calculated using Cox proportional hazards models after adjustment for age at enrollment (continuous variable), and known pre-existing illness either cured or not (yes, and no including those with missing information).

<sup>c</sup> Due to relatively small numbers in some subgroups, analysis of 7 categories produced more stable results than analysis of 18 categories.

<sup>d</sup> Age groups at 18-44 years, 45-64 years, and 65-99 years

<sup>e</sup> 7 categories.

**Table S6. Hazard ratio<sup>a</sup> of death associated with standard five categories<sup>b</sup> of body mass index according to sex and age<sup>c</sup> (6 groups) among all participants and never-smokers.**

| Table S6                          |                              | All participants (n=12,832,637) |               |          |                   |                        | Never-smokers (n=7,436,748) |          |                   |  |  |
|-----------------------------------|------------------------------|---------------------------------|---------------|----------|-------------------|------------------------|-----------------------------|----------|-------------------|--|--|
| Sex-age group                     | BMI <sup>b</sup> at baseline | Follow-up person-years          | No. of deaths | p- value | HR (95% CI)       | Follow-up person-years | No. of deaths               | p- value | HR (95% CI)       |  |  |
| Men and women<br>at all ages      | <18.5                        | 5,788,716                       | 52,213        | <0.001   | 1.72 (1.71, 1.74) | 3,832,331              | 25,174                      | <0.001   | 1.78 (1.76, 1.81) |  |  |
|                                   | 18.5-24.9                    | 88,305,674                      | 455,072       |          | 1.00 (Reference)  | 51,360,467             | 237,824                     |          | 1.00 (Reference)  |  |  |
|                                   | 25.0-29.9                    | 37,264,890                      | 172,236       | <0.001   | 0.83 (0.83, 0.84) | 20,371,306             | 102,699                     | <0.001   | 0.85 (0.85, 0.86) |  |  |
|                                   | 30.0-34.9                    | 3,464,851                       | 16,594        | 0.616    | 1.00 (0.98, 1.01) | 1,984,022              | 10,921                      | 0.393    | 1.01 (0.99, 1.03) |  |  |
|                                   | 35.0-50.0                    | 250,428                         | 1,268         | <0.001   | 1.28 (1.21, 1.36) | 151,605                | 885                         | <0.001   | 1.28 (1.2, 1.37)  |  |  |
| Men and women<br>at 18-34 years   | <18.5                        | 3,523,593                       | 1,508         | <0.001   | 1.17 (1.11, 1.24) | 2,496,701              | 807                         | 0.002    | 1.13 (1.04, 1.22) |  |  |
|                                   | 18.5-24.9                    | 28,179,853                      | 13,819        |          | 1.00 (Reference)  | 14,772,487             | 5,064                       |          | 1.00 (Reference)  |  |  |
|                                   | 25.0-29.9                    | 7,595,266                       | 4,565         | 0.692    | 0.99 (0.96, 1.03) | 2,671,948              | 1,214                       | 0.060    | 1.06 (1, 1.14)    |  |  |
|                                   | 30.0-34.9                    | 900,654                         | 745           | <0.001   | 1.39 (1.29, 1.49) | 309,859                | 188                         | <0.001   | 1.48 (1.28, 1.72) |  |  |
|                                   | 35.0-50.0                    | 88,854                          | 103           | <0.001   | 2.11 (1.74, 2.56) | 34,761                 | 29                          | <0.001   | 2.26 (1.57, 3.25) |  |  |
| Men and women<br>at 35-44 years   | <18.5                        | 865,651                         | 1,825         | <0.001   | 1.75 (1.67, 1.83) | 528,464                | 663                         | <0.001   | 1.56 (1.44, 1.69) |  |  |
|                                   | 18.5-24.9                    | 23,350,159                      | 30,951        |          | 1.00 (Reference)  | 12,954,675             | 11,763                      |          | 1.00 (Reference)  |  |  |
|                                   | 25.0-29.9                    | 9,999,822                       | 13,672        | <0.001   | 0.92 (0.9, 0.93)  | 4,528,005              | 4,933                       | 0.012    | 1.04 (1.01, 1.08) |  |  |
|                                   | 30.0-34.9                    | 853,671                         | 1,491         | <0.001   | 1.21 (1.15, 1.28) | 407,852                | 583                         | <0.001   | 1.42 (1.3, 1.54)  |  |  |
|                                   | 35.0-50.0                    | 53,648                          | 122           | <0.001   | 1.72 (1.44, 2.05) | 30,271                 | 52                          | <0.001   | 1.81 (1.38, 2.38) |  |  |
| Men and women<br>at 45-54 years   | <18.5                        | 453,202                         | 3,296         | <0.001   | 2.16 (2.09, 2.24) | 259,423                | 1,082                       | <0.001   | 2.11 (1.99, 2.25) |  |  |
|                                   | 18.5-24.9                    | 17,983,565                      | 56,248        |          | 1.00 (Reference)  | 11,089,068             | 22,521                      |          | 1.00 (Reference)  |  |  |
|                                   | 25.0-29.9                    | 9,587,994                       | 26,862        | <0.001   | 0.85 (0.84, 0.86) | 5,754,509              | 12,390                      | <0.001   | 0.95 (0.93, 0.97) |  |  |
|                                   | 30.0-34.9                    | 801,874                         | 2,602         | <0.001   | 1.09 (1.04, 1.13) | 536,332                | 1,402                       | <0.001   | 1.23 (1.17, 1.3)  |  |  |
|                                   | 35.0-50.0                    | 51,041                          | 186           | <0.001   | 1.45 (1.25, 1.67) | 38,896                 | 125                         | <0.001   | 1.68 (1.41, 2)    |  |  |
| Men and women<br>at 55-64 years   | <18.5                        | 394,936                         | 8,517         | <0.001   | 2.06 (2.02, 2.11) | 220,063                | 3,187                       | <0.001   | 2.16 (2.08, 2.24) |  |  |
|                                   | 18.5-24.9                    | 11,468,424                      | 103,167       |          | 1.00 (Reference)  | 7,482,162              | 48,584                      |          | 1.00 (Reference)  |  |  |
|                                   | 25.0-29.9                    | 6,723,869                       | 46,023        | <0.001   | 0.83 (0.82, 0.83) | 4,800,877              | 27,061                      | <0.001   | 0.87 (0.86, 0.88) |  |  |
|                                   | 30.0-34.9                    | 599,722                         | 4,443         | 0.492    | 1.01 (0.98, 1.04) | 471,257                | 3,090                       | <0.001   | 1.09 (1.05, 1.13) |  |  |
|                                   | 35.0-50.0                    | 37,806                          | 350           | <0.001   | 1.40 (1.26, 1.56) | 31,277                 | 271                         | <0.001   | 1.51 (1.34, 1.70) |  |  |
| Men and women<br>at 65-74 years   | <18.5                        | 390,510                         | 19,253        | <0.001   | 1.73 (1.7, 1.75)  | 226,036                | 8,928                       | <0.001   | 1.82 (1.78, 1.86) |  |  |
|                                   | 18.5-24.9                    | 5,988,698                       | 153,986       |          | 1.00 (Reference)  | 4,106,810              | 85,997                      |          | 1.00 (Reference)  |  |  |
|                                   | 25.0-29.9                    | 2,903,981                       | 55,267        | <0.001   | 0.84 (0.83, 0.85) | 2,254,002              | 37,778                      | <0.001   | 0.85 (0.84, 0.86) |  |  |
|                                   | 30.0-34.9                    | 270,212                         | 5,138         | <0.001   | 0.95 (0.92, 0.98) | 226,321                | 3,914                       | 0.007    | 0.96 (0.93, 0.99) |  |  |
|                                   | 35.0-50.0                    | 16,432                          | 364           | 0.003    | 1.17 (1.06, 1.3)  | 14,207                 | 299                         | 0.003    | 1.19 (1.06, 1.33) |  |  |
| Men and women<br>at 75-99 years   | <18.5                        | 160,823                         | 17,814        | <0.001   | 1.48 (1.46, 1.51) | 101,645                | 10,507                      | <0.001   | 1.53 (1.5, 1.56)  |  |  |
|                                   | 18.5-24.9                    | 1,334,975                       | 96,901        |          | 1.00 (Reference)  | 955,265                | 63,895                      |          | 1.00 (Reference)  |  |  |
|                                   | 25.0-29.9                    | 453,959                         | 25,847        | <0.001   | 0.84 (0.83, 0.85) | 361,964                | 19,323                      | <0.001   | 0.84 (0.82, 0.85) |  |  |
|                                   | 30.0-34.9                    | 38,718                          | 2,175         | <0.001   | 0.89 (0.86, 0.93) | 32,402                 | 1,744                       | <0.001   | 0.90 (0.85, 0.94) |  |  |
|                                   | 35.0-50.0                    | 2,647                           | 143           | 0.066    | 0.86 (0.73, 1.01) | 2,193                  | 109                         | 0.061    | 0.84 (0.69, 1.01) |  |  |
| Men at all ages<br>at 18-34 years | <18.5                        | 1,981,652                       | 35,265        | <0.001   | 1.77 (1.75, 1.79) | 583,830                | 12,204                      | <0.001   | 1.92 (1.88, 1.95) |  |  |
|                                   | 18.5-24.9                    | 48,910,732                      | 308,542       |          | 1.00 (Reference)  | 16,523,311             | 114,904                     |          | 1.00 (Reference)  |  |  |
|                                   | 25.0-29.9                    | 24,038,475                      | 104,390       | <0.001   | 0.80 (0.79, 0.8)  | 8,537,792              | 43,855                      | <0.001   | 0.81 (0.8, 0.82)  |  |  |
|                                   | 30.0-34.9                    | 1,931,635                       | 7,530         | 0.002    | 0.96 (0.94, 0.99) | 626,697                | 3,061                       | 0.117    | 0.97 (0.94, 1.01) |  |  |
|                                   | 35.0-50.0                    | 116,337                         | 448           | <0.001   | 1.35 (1.23, 1.48) | 35,067                 | 166                         | 0.003    | 1.25 (1.08, 1.46) |  |  |
| Men<br>at 18-34 years             | <18.5                        | 849,092                         | 734           | <0.001   | 1.38 (1.28, 1.48) | 227,459                | 181                         | <0.001   | 1.69 (1.45, 1.96) |  |  |
|                                   | 18.5-24.9                    | 16,582,994                      | 10,464        |          | 1.00 (Reference)  | 4,860,946              | 2,336                       |          | 1.00 (Reference)  |  |  |

| Table S6          |                              | All participants (n=12,832,637) |               |                   |                   | Never-smokers (n=7,436,748) |               |                   |                   |                  |
|-------------------|------------------------------|---------------------------------|---------------|-------------------|-------------------|-----------------------------|---------------|-------------------|-------------------|------------------|
| Sex-age group     | BMI <sup>1</sup> at baseline | Follow-up person-years          | No. of deaths | p- value          | HR (95% CI)       | Follow-up person-years      | No. of deaths | p- value          | HR (95% CI)       |                  |
| Men               | 25.0-29.9                    | 6,581,129                       | 4,173         | 0.153             | 0.97 (0.94, 1.01) | 1,819,319                   | 890           | 0.852             | 0.99 (0.92, 1.07) |                  |
|                   | 30.0-34.9                    | 753,779                         | 687           | <0.001            | 1.39 (1.29, 1.5)  | 190,866                     | 140           | <0.001            | 1.49 (1.26, 1.77) |                  |
|                   | 35.0-50.0                    | 66,411                          | 87            | <0.001            | 2.06 (1.67, 2.54) | 17,162                      | 17            | 0.003             | 2.08 (1.29, 3.35) |                  |
|                   | <18.5                        | 394,202                         | 1,338         | <0.001            | 1.90 (1.8, 2.01)  | 106,888                     | 262           | <0.001            | 1.91 (1.69, 2.16) |                  |
|                   | at 35-44 years               | 18.5-24.9                       | 13,629,157    | 23,514            |                   | 1.00 (Reference)            | 4,172,935     | 5,364             |                   | 1.00 (Reference) |
|                   | 25.0-29.9                    | 7,584,762                       | 11,397        | <0.001            | 0.87 (0.85, 0.89) | 2,356,199                   | 2,971         | 0.114             | 0.96 (0.92, 1.01) |                  |
|                   | 30.0-34.9                    | 588,465                         | 1,162         | <0.001            | 1.15 (1.09, 1.22) | 171,976                     | 295           | <0.001            | 1.32 (1.17, 1.48) |                  |
|                   | 35.0-50.0                    | 28,268                          | 83            | <0.001            | 1.71 (1.38, 2.12) | 8,129                       | 20            | 0.004             | 1.92 (1.24, 2.98) |                  |
|                   | <18.5                        | 235,162                         | 2,672         | <0.001            | 2.23 (2.14, 2.32) | 67,387                      | 554           | <0.001            | 2.33 (2.14, 2.54) |                  |
|                   | at 45-54 years               | 18.5-24.9                       | 9,207,552     | 43,023            |                   | 1.00 (Reference)            | 3,211,654     | 11,139            |                   | 1.00 (Reference) |
|                   | 25.0-29.9                    | 5,536,910                       | 20,173        | <0.001            | 0.80 (0.79, 0.82) | 2,117,938                   | 6,553         | <0.001            | 0.88 (0.85, 0.91) |                  |
|                   | 30.0-34.9                    | 347,756                         | 1,617         | 0.791             | 1.01 (0.96, 1.06) | 133,515                     | 553           | 0.001             | 1.16 (1.06, 1.26) |                  |
|                   | 35.0-50.0                    | 12,379                          | 73            | 0.066             | 1.24 (0.99, 1.56) | 4,789                       | 27            | 0.021             | 1.56 (1.07, 2.28) |                  |
|                   | <18.5                        | 224,799                         | 6,836         | <0.001            | 2.08 (2.03, 2.13) | 72,238                      | 1,841         | <0.001            | 2.32 (2.21, 2.43) |                  |
|                   | at 55-64 years               | 18.5-24.9                       | 6,005,522     | 77,705            |                   | 1.00 (Reference)            | 2,560,270     | 26,547            |                   | 1.00 (Reference) |
| 25.0-29.9         | 3,121,733                    | 29,890                          | <0.001        | 0.78 (0.77, 0.79) | 1,544,978         | 12,846                      | <0.001        | 0.81 (0.79, 0.83) |                   |                  |
| 30.0-34.9         | 180,408                      | 1,983                           | <0.001        | 0.89 (0.85, 0.93) | 93,571            | 947                         | 0.391         | 0.97 (0.91, 1.04) |                   |                  |
| 35.0-50.0         | 6,859                        | 98                              | 0.197         | 1.14 (0.93, 1.39) | 3,460             | 50                          | 0.051         | 1.32 (1.00, 1.74) |                   |                  |
| <18.5             | 206,928                      | 13,774                          | <0.001        | 1.77 (1.74, 1.8)  | 77,049            | 4,835                       | <0.001        | 2.00 (1.94, 2.06) |                   |                  |
| at 65-74 years    | 18.5-24.9                    | 2,910,138                       | 101,879       |                   | 1.00 (Reference)  | 1,402,681                   | 42,515        |                   | 1.00 (Reference)  |                  |
| 25.0-29.9         | 1,067,340                    | 28,092                          | <0.001        | 0.79 (0.78, 0.8)  | 607,168           | 14,246                      | <0.001        | 0.79 (0.78, 0.81) |                   |                  |
| 30.0-34.9         | 54,317                       | 1,571                           | <0.001        | 0.89 (0.84, 0.93) | 32,400            | 819                         | <0.001        | 0.87 (0.81, 0.93) |                   |                  |
| 35.0-50.0         | 2,089                        | 75                              | 0.438         | 1.09 (0.87, 1.37) | 1,319             | 35                          | 0.435         | 0.88 (0.63, 1.22) |                   |                  |
| <18.5             | 71,468                       | 9,911                           | <0.001        | 1.53 (1.5, 1.57)  | 32,807            | 4,531                       | <0.001        | 1.63 (1.58, 1.69) |                   |                  |
| at 75-99 years    | 18.5-24.9                    | 575,369                         | 51,957        |                   | 1.00 (Reference)  | 314,825                     | 27,003        |                   | 1.00 (Reference)  |                  |
| 25.0-29.9         | 146,602                      | 10,665                          | <0.001        | 0.81 (0.79, 0.83) | 92,189            | 6,349                       | <0.001        | 0.80 (0.77, 0.82) |                   |                  |
| 30.0-34.9         | 6,909                        | 510                             | <0.001        | 0.82 (0.75, 0.89) | 4,369             | 307                         | <0.001        | 0.79 (0.71, 0.89) |                   |                  |
| 35.0-50.0         | 331                          | 32                              | 0.611         | 1.09 (0.77, 1.55) | 208               | 17                          | 0.779         | 0.93 (0.58, 1.5)  |                   |                  |
| Women at all ages | <18.5                        | 3,807,064                       | 16,948        | <0.001            | 1.63 (1.6, 1.65)  | 3,248,502                   | 12,970        | <0.001            | 1.68 (1.65, 1.71) |                  |
| 18.5-24.9         | 39,394,942                   | 146,530                         |               | 1.00 (Reference)  | 34,837,155        | 122,920                     |               | 1.00 (Reference)  |                   |                  |
| 25.0-29.9         | 13,226,415                   | 67,846                          | <0.001        | 0.88 (0.87, 0.89) | 11,833,514        | 58,844                      | <0.001        | 0.88 (0.87, 0.89) |                   |                  |
| 30.0-34.9         | 1,533,216                    | 9,064                           | 0.120         | 1.02 (1, 1.04)    | 1,357,326         | 7,860                       | 0.135         | 1.02 (0.99, 1.04) |                   |                  |
| 35.0-50.0         | 134,091                      | 820                             | <0.001        | 1.26 (1.17, 1.35) | 116,538           | 719                         | <0.001        | 1.29 (1.2, 1.38)  |                   |                  |
| <18.5             | 2,674,501                    | 774                             | 0.460         | 1.03 (0.95, 1.11) | 2,269,241         | 626                         | 0.433         | 1.04 (0.95, 1.13) |                   |                  |
| at 18-34 years    | 18.5-24.9                    | 11,596,860                      | 3,355         |                   | 1.00 (Reference)  | 9,911,540                   | 2,728         |                   | 1.00 (Reference)  |                  |
| 25.0-29.9         | 1,014,137                    | 392                             | <0.001        | 1.29 (1.16, 1.43) | 852,629           | 324                         | <0.001        | 1.35 (1.2, 1.51)  |                   |                  |
| 30.0-34.9         | 146,874                      | 58                              | 0.041         | 1.31 (1.01, 1.7)  | 118,993           | 48                          | 0.010         | 1.46 (1.1, 1.94)  |                   |                  |
| 35.0-50.0         | 22,443                       | 16                              | 0.001         | 2.36 (1.44, 3.85) | 17,599            | 12                          | 0.001         | 2.51 (1.43, 4.43) |                   |                  |
| <18.5             | 471,449                      | 487                             | <0.001        | 1.42 (1.3, 1.56)  | 421,575           | 401                         | <0.001        | 1.39 (1.26, 1.54) |                   |                  |
| at 35-44 years    | 18.5-24.9                    | 9,721,002                       | 7,437         |                   | 1.00 (Reference)  | 8,781,740                   | 6,399         |                   | 1.00 (Reference)  |                  |
| 25.0-29.9         | 2,415,060                    | 2,275                           | <0.001        | 1.16 (1.11, 1.22) | 2,171,806         | 1,962                       | <0.001        | 1.17 (1.11, 1.23) |                   |                  |
| 30.0-34.9         | 265,206                      | 329                             | <0.001        | 1.47 (1.32, 1.64) | 235,876           | 288                         | <0.001        | 1.53 (1.36, 1.73) |                   |                  |
| 35.0-50.0         | 25,380                       | 39                              | <0.001        | 1.76 (1.28, 2.4)  | 22,142            | 32                          | 0.001         | 1.77 (1.25, 2.51) |                   |                  |
| <18.5             | 218,040                      | 624                             | <0.001        | 1.89 (1.75, 2.05) | 192,036           | 528                         | <0.001        | 1.93 (1.76, 2.1)  |                   |                  |

| Table S6       |                              | All participants (n=12,832,637) |               |          |                   | Never-smokers (n=7,436,748) |               |          |                   |
|----------------|------------------------------|---------------------------------|---------------|----------|-------------------|-----------------------------|---------------|----------|-------------------|
| Sex-age group  | BMI <sup>b</sup> at baseline | Follow-up person-years          | No. of deaths | p- value | HR (95% CI)       | Follow-up person-years      | No. of deaths | p- value | HR (95% CI)       |
| at 45-54 years | 18.5-24.9                    | 8,776,013                       | 13,225        |          | 1.00 (Reference)  | 7,877,415                   | 11,382        |          | 1.00 (Reference)  |
|                | 25.0-29.9                    | 4,051,084                       | 6,689         | 0.133    | 1.02 (0.99, 1.05) | 3,636,571                   | 5,837         | 0.035    | 1.03 (1, 1.07)    |
|                | 30.0-34.9                    | 454,118                         | 985           | <0.001   | 1.28 (1.2, 1.36)  | 402,817                     | 849           | <0.001   | 1.30 (1.21, 1.4)  |
|                | 35.0-50.0                    | 38,662                          | 113           | <0.001   | 1.68 (1.39, 2.02) | 34,107                      | 98            | <0.001   | 1.74 (1.43, 2.12) |
|                | Women                        | <18.5                           | 170,137       | 1,681    | <0.001            | 1.98 (1.88, 2.08)           | 147,825       | 1,346    | <0.001            |
| at 55-64 years | 18.5-24.9                    | 5,462,901                       | 25,462        |          | 1.00 (Reference)  | 4,921,892                   | 22,037        |          | 1.00 (Reference)  |
|                | 25.0-29.9                    | 3,602,137                       | 16,133        | <0.001   | 0.92 (0.9, 0.94)  | 3,255,899                   | 14,215        | <0.001   | 0.93 (0.91, 0.95) |
|                | 30.0-34.9                    | 419,314                         | 2,460         | <0.001   | 1.15 (1.11, 1.2)  | 377,686                     | 2,143         | <0.001   | 1.16 (1.11, 1.21) |
|                | 35.0-50.0                    | 30,947                          | 252           | <0.001   | 1.57 (1.38, 1.78) | 27,818                      | 221           | <0.001   | 1.58 (1.39, 1.81) |
|                | Women                        | <18.5                           | 183,582       | 5,479    | <0.001            | 1.62 (1.58, 1.67)           | 148,986       | 4,093    | <0.001            |
| at 65-74 years | 18.5-24.9                    | 3,078,560                       | 52,107        |          | 1.00 (Reference)  | 2,704,128                   | 43,482        |          | 1.00 (Reference)  |
|                | 25.0-29.9                    | 1,836,641                       | 27,175        | <0.001   | 0.89 (0.88, 0.9)  | 1,646,834                   | 23,532        | <0.001   | 0.89 (0.88, 0.9)  |
|                | 30.0-34.9                    | 215,895                         | 3,567         | 0.647    | 0.99 (0.96, 1.03) | 193,921                     | 3,095         | 0.535    | 0.99 (0.95, 1.03) |
|                | 35.0-50.0                    | 14,343                          | 289           | 0.001    | 1.21 (1.08, 1.36) | 12,888                      | 264           | <0.001   | 1.26 (1.12, 1.42) |
|                | Women                        | <18.5                           | 89,355        | 7,903    | <0.001            | 1.41 (1.38, 1.45)           | 68,838        | 5,976    | <0.001            |
| at 75-99 years | 18.5-24.9                    | 759,606                         | 44,944        |          | 1.00 (Reference)  | 640,440                     | 36,892        |          | 1.00 (Reference)  |
|                | 25.0-29.9                    | 307,357                         | 15,182        | <0.001   | 0.87 (0.85, 0.89) | 269,775                     | 12,974        | <0.001   | 0.86 (0.85, 0.88) |
|                | 30.0-34.9                    | 31,808                          | 1,665         | 0.002    | 0.93 (0.88, 0.97) | 28,033                      | 1,437         | 0.004    | 0.93 (0.88, 0.98) |
|                | 35.0-50.0                    | 2,317                           | 111           | 0.024    | 0.81 (0.67, 0.97) | 1,984                       | 92            | 0.062    | 0.82 (0.67, 1.01) |

BMI, body mass index; CI, confidence interval; HR, hazard ratio.

<sup>a</sup> Hazard ratios were calculated using Cox proportional hazards models after adjustment for age at enrollment (continuous variable), sex (men, and women; only in the analysis for both sexes combined) smoking status (current smoker, former smoker, never-smoker, and those with missing smoking status; only in the analysis for all participants), and known pre-existing illness either cured or not (yes, and no including those with missing information).

<sup>b</sup> 5 categories. Analysis was done for comparison with other research using current standard cut-off points.

<sup>c</sup> Age groups at all ages, 18-34 years, 35-44 years, 45-54 years, 55-64 years, 45-64 years, 65-74 years, and 75-99 years.

**Table S7. Hazard ratio<sup>a</sup> of death associated with standard four categories<sup>b</sup> of body mass index according to sex and age<sup>c</sup> (6 groups) among all participants and never-smokers.**

| Table S7                        |                              | All participants (n=12,832,637) |               |          |                   |                        | Never-smokers (n=7,436,748) |          |                   |  |  |
|---------------------------------|------------------------------|---------------------------------|---------------|----------|-------------------|------------------------|-----------------------------|----------|-------------------|--|--|
| Sex-age group                   | BMI <sup>b</sup> at baseline | Follow-up person-years          | No. of deaths | p- value | HR (95% CI)       | Follow-up person-years | No. of deaths               | p- value | HR (95% CI)       |  |  |
| Men and women<br>at all ages    | <18.5                        | 5,788,716                       | 52,213        | <0.001   | 1.72 (1.71, 1.74) | 3,832,331              | 25,174                      | <0.001   | 1.78 (1.76, 1.81) |  |  |
|                                 | 18.5-24.9                    | 88,305,674                      | 455,072       |          | 1.00 (Reference)  | 51,360,467             | 237,824                     |          | 1.00 (Reference)  |  |  |
|                                 | 25.0-29.9                    | 37,264,890                      | 172,236       | <0.001   | 0.83 (0.83, 0.84) | 20,371,306             | 102,699                     | <0.001   | 0.85 (0.85, 0.86) |  |  |
|                                 | 30.0-50.0                    | 3,715,278                       | 17,862        | 0.119    | 1.01 (1, 1.03)    | 2,135,628              | 11,806                      | 0.010    | 1.02 (1.01, 1.04) |  |  |
| Men and women<br>at 18-34 years | <18.5                        | 3,523,593                       | 1,508         | <0.001   | 1.17 (1.11, 1.24) | 2,496,701              | 807                         | 0.002    | 1.13 (1.04, 1.22) |  |  |
|                                 | 18.5-24.9                    | 28,179,853                      | 13,819        |          | 1.00 (Reference)  | 14,772,487             | 5,064                       |          | 1.00 (Reference)  |  |  |
|                                 | 25.0-29.9                    | 7,595,266                       | 4,565         | 0.701    | 0.99 (0.96, 1.03) | 2,671,948              | 1,214                       | 0.059    | 1.06 (1, 1.14)    |  |  |
|                                 | 30.0-50.0                    | 989,507                         | 848           | <0.001   | 1.45 (1.35, 1.55) | 344,620                | 217                         | <0.001   | 1.55 (1.35, 1.78) |  |  |
| Men and women<br>at 35-44 years | <18.5                        | 865,651                         | 1,825         | <0.001   | 1.75 (1.67, 1.83) | 528,464                | 663                         | <0.001   | 1.56 (1.44, 1.69) |  |  |
|                                 | 18.5-24.9                    | 23,350,159                      | 30,951        |          | 1.00 (Reference)  | 12,954,675             | 11,763                      |          | 1.00 (Reference)  |  |  |
|                                 | 25.0-29.9                    | 9,999,822                       | 13,672        | <0.001   | 0.92 (0.9, 0.93)  | 4,528,005              | 4,933                       | 0.012    | 1.04 (1.01, 1.08) |  |  |
|                                 | 30.0-50.0                    | 907,319                         | 1,613         | <0.001   | 1.24 (1.18, 1.30) | 438,123                | 635                         | <0.001   | 1.44 (1.33, 1.56) |  |  |
| Men and women<br>at 45-54 years | <18.5                        | 453,202                         | 3,296         | <0.001   | 2.16 (2.09, 2.24) | 259,423                | 1,082                       | <0.001   | 2.11 (1.99, 2.25) |  |  |
|                                 | 18.5-24.9                    | 17,983,565                      | 56,248        |          | 1.00 (Reference)  | 11,089,068             | 22,521                      |          | 1.00 (Reference)  |  |  |
|                                 | 25.0-29.9                    | 9,587,994                       | 26,862        | <0.001   | 0.85 (0.84, 0.86) | 5,754,509              | 12,390                      | <0.001   | 0.95 (0.93, 0.97) |  |  |
|                                 | 30.0-50.0                    | 852,915                         | 2,788         | <0.001   | 1.11 (1.06, 1.15) | 575,229                | 1,527                       | <0.001   | 1.26 (1.2, 1.33)  |  |  |
| Men and women<br>at 55-64 years | <18.5                        | 394,936                         | 8,517         | <0.001   | 2.06 (2.02, 2.11) | 220,063                | 3,187                       | <0.001   | 2.16 (2.08, 2.24) |  |  |
|                                 | 18.5-24.9                    | 11,468,424                      | 103,167       |          | 1.00 (Reference)  | 7,482,162              | 48,584                      |          | 1.00 (Reference)  |  |  |
|                                 | 25.0-29.9                    | 6,723,869                       | 46,023        | <0.001   | 0.83 (0.82, 0.83) | 4,800,877              | 27,061                      | <0.001   | 0.87 (0.86, 0.88) |  |  |
|                                 | 30.0-50.0                    | 637,528                         | 4,793         | 0.037    | 1.03 (1, 1.06)    | 502,534                | 3,361                       | <0.001   | 1.11 (1.07, 1.15) |  |  |
| Men and women<br>at 65-74 years | <18.5                        | 390,510                         | 19,253        | <0.001   | 1.73 (1.7, 1.75)  | 226,036                | 8,928                       | <0.001   | 1.82 (1.78, 1.86) |  |  |
|                                 | 18.5-24.9                    | 5,988,698                       | 153,986       |          | 1.00 (Reference)  | 4,106,810              | 85,997                      |          | 1.00 (Reference)  |  |  |
|                                 | 25.0-29.9                    | 2,903,981                       | 55,267        | <0.001   | 0.84 (0.83, 0.85) | 2,254,002              | 37,778                      | <0.001   | 0.85 (0.84, 0.86) |  |  |
|                                 | 30.0-50.0                    | 286,644                         | 5,502         | 0.004    | 0.96 (0.94, 0.99) | 240,527                | 4,213                       | 0.057    | 0.97 (0.94, 1)    |  |  |
| Men and women<br>at 75-99 years | <18.5                        | 160,823                         | 17,814        | <0.001   | 1.48 (1.46, 1.51) | 101,645                | 10,507                      | <0.001   | 1.53 (1.5, 1.56)  |  |  |
|                                 | 18.5-24.9                    | 1,334,975                       | 96,901        |          | 1.00 (Reference)  | 955,265                | 63,895                      |          | 1.00 (Reference)  |  |  |
|                                 | 25.0-29.9                    | 453,959                         | 25,847        | <0.001   | 0.84 (0.83, 0.85) | 361,964                | 19,323                      | <0.001   | 0.84 (0.82, 0.85) |  |  |
|                                 | 30.0-50.0                    | 41,365                          | 2,318         | <0.001   | 0.89 (0.86, 0.93) | 34,595                 | 1,853                       | <0.001   | 0.89 (0.85, 0.93) |  |  |
| Men at all ages                 | <18.5                        | 1,981,652                       | 35,265        | <0.001   | 1.77 (1.75, 1.79) | 583,830                | 12,204                      | <0.001   | 1.92 (1.88, 1.95) |  |  |
|                                 | 18.5-24.9                    | 48,910,732                      | 308,542       |          | 1.00 (Reference)  | 16,523,311             | 114,904                     |          | 1.00 (Reference)  |  |  |
|                                 | 25.0-29.9                    | 24,038,475                      | 104,390       | <0.001   | 0.80 (0.79, 0.8)  | 8,537,792              | 43,855                      | <0.001   | 0.81 (0.8, 0.82)  |  |  |
|                                 | 30.0-50.0                    | 2,047,972                       | 7,978         | 0.078    | 0.98 (0.96, 1)    | 661,764                | 3,227                       | 0.340    | 0.98 (0.95, 1.02) |  |  |
| Men<br>at 18-34 years           | <18.5                        | 849,092                         | 734           | <0.001   | 1.38 (1.28, 1.48) | 227,459                | 181                         | <0.001   | 1.69 (1.45, 1.96) |  |  |
|                                 | 18.5-24.9                    | 16,582,994                      | 10,464        |          | 1.00 (Reference)  | 4,860,946              | 2,336                       |          | 1.00 (Reference)  |  |  |
|                                 | 25.0-29.9                    | 6,581,129                       | 4,173         | 0.155    | 0.97 (0.94, 1.01) | 1,819,319              | 890                         | 0.855    | 0.99 (0.92, 1.07) |  |  |
|                                 | 30.0-50.0                    | 820,190                         | 774           | <0.001   | 1.45 (1.34, 1.55) | 208,029                | 157                         | <0.001   | 1.54 (1.31, 1.81) |  |  |
| Men<br>at 35-44 years           | <18.5                        | 394,202                         | 1,338         | <0.001   | 1.90 (1.8, 2.01)  | 106,888                | 262                         | <0.001   | 1.91 (1.69, 2.16) |  |  |
|                                 | 18.5-24.9                    | 13,629,157                      | 23,514        |          | 1.00 (Reference)  | 4,172,935              | 5,364                       |          | 1.00 (Reference)  |  |  |
|                                 | 25.0-29.9                    | 7,584,762                       | 11,397        | <0.001   | 0.87 (0.85, 0.89) | 2,356,199              | 2,971                       | 0.114    | 0.96 (0.92, 1.01) |  |  |
|                                 | 30.0-50.0                    | 616,734                         | 1,245         | <0.001   | 1.18 (1.11, 1.25) | 180,105                | 315                         | <0.001   | 1.34 (1.20, 1.50) |  |  |
| Men<br>at 45-54 years           | <18.5                        | 235,162                         | 2,672         | <0.001   | 2.23 (2.14, 2.32) | 67,387                 | 554                         | <0.001   | 2.33 (2.14, 2.54) |  |  |
|                                 | 18.5-24.9                    | 9,207,552                       | 43,023        |          | 1.00 (Reference)  | 3,211,654              | 11,139                      |          | 1.00 (Reference)  |  |  |
|                                 | 25.0-29.9                    | 5,536,910                       | 20,173        | <0.001   | 0.80 (0.79, 0.82) | 2,117,938              | 6,553                       | <0.001   | 0.88 (0.85, 0.91) |  |  |
|                                 | 30.0-50.0                    | 360,135                         | 1,690         | 0.548    | 1.02 (0.97, 1.07) | 138,304                | 580                         | <0.001   | 1.17 (1.08, 1.27) |  |  |
| Men<br>at 55-64 years           | <18.5                        | 224,799                         | 6,836         | <0.001   | 2.08 (2.03, 2.13) | 72,238                 | 1,841                       | <0.001   | 2.32 (2.21, 2.43) |  |  |
|                                 | 18.5-24.9                    | 6,005,522                       | 77,705        |          | 1.00 (Reference)  | 2,560,270              | 26,547                      |          | 1.00 (Reference)  |  |  |
|                                 | 25.0-29.9                    | 3,121,733                       | 29,890        | <0.001   | 0.78 (0.77, 0.79) | 1,544,978              | 12,846                      | <0.001   | 0.81 (0.79, 0.83) |  |  |
|                                 | 30.0-50.0                    | 187,267                         | 2,081         | <0.001   | 0.90 (0.86, 0.94) | 97,030                 | 997                         | 0.639    | 0.98 (0.92, 1.05) |  |  |
| Men<br>at 65-74 years           | <18.5                        | 206,928                         | 13,774        | <0.001   | 1.77 (1.74, 1.8)  | 77,049                 | 4,835                       | <0.001   | 2.00 (1.94, 2.06) |  |  |
|                                 | 18.5-24.9                    | 2,910,138                       | 101,879       |          | 1.00 (Reference)  | 1,402,681              | 42,515                      |          | 1.00 (Reference)  |  |  |
|                                 | 25.0-29.9                    | 1,067,340                       | 28,092        | <0.001   | 0.79 (0.78, 0.8)  | 607,168                | 14,246                      | <0.001   | 0.79 (0.78, 0.81) |  |  |

| Table S7             |                              | All participants (n=12,832,637) |               |          |                   | Never-smokers (n=7,436,748) |               |          |                   |
|----------------------|------------------------------|---------------------------------|---------------|----------|-------------------|-----------------------------|---------------|----------|-------------------|
| Sex-age group        | BMI <sup>b</sup> at baseline | Follow-up person-years          | No. of deaths | p- value | HR (95% CI)       | Follow-up person-years      | No. of deaths | p- value | HR (95% CI)       |
| Men at 75-99 years   | 30.0-50.0                    | 56,406                          | 1,646         | <0.001   | 0.90 (0.85, 0.94) | 33,718                      | 854           | <0.001   | 0.87 (0.81, 0.93) |
|                      | <18.5                        | 71,468                          | 9,911         | <0.001   | 1.53 (1.5, 1.57)  | 32,807                      | 4,531         | <0.001   | 1.63 (1.58, 1.69) |
|                      | 18.5-24.9                    | 575,369                         | 51,957        |          | 1.00 (Reference)  | 314,825                     | 27,003        |          | 1.00 (Reference)  |
|                      | 25.0-29.9                    | 146,602                         | 10,665        | <0.001   | 0.81 (0.79, 0.83) | 92,189                      | 6,349         | <0.001   | 0.80 (0.77, 0.82) |
| Women at all ages    | 30.0-50.0                    | 7,240                           | 542           | <0.001   | 0.83 (0.76, 0.9)  | 4,577                       | 324           | <0.001   | 0.80 (0.72, 0.89) |
|                      | <18.5                        | 3,807,064                       | 16,948        | <0.001   | 1.63 (1.6, 1.65)  | 3,248,502                   | 12,970        | <0.001   | 1.68 (1.65, 1.71) |
|                      | 18.5-24.9                    | 39,394,942                      | 146,530       |          | 1.00 (Reference)  | 34,837,155                  | 122,920       |          | 1.00 (Reference)  |
|                      | 25.0-29.9                    | 13,226,415                      | 67,846        | <0.001   | 0.88 (0.87, 0.89) | 11,833,514                  | 58,844        | <0.001   | 0.88 (0.87, 0.89) |
| Women at 18-34 years | 30.0-50.0                    | 1,667,306                       | 9,884         | 0.002    | 1.03 (1.01, 1.05) | 1,473,864                   | 8,579         | 0.002    | 1.04 (1.01, 1.06) |
|                      | <18.5                        | 2,674,501                       | 774           | 0.461    | 1.03 (0.95, 1.11) | 2,269,241                   | 626           | 0.433    | 1.04 (0.95, 1.13) |
|                      | 18.5-24.9                    | 11,596,860                      | 3,355         |          | 1.00 (Reference)  | 9,911,540                   | 2,728         |          | 1.00 (Reference)  |
|                      | 25.0-29.9                    | 1,014,137                       | 392           | <0.001   | 1.29 (1.16, 1.43) | 852,629                     | 324           | <0.001   | 1.35 (1.2, 1.51)  |
| Women at 35-44 years | 30.0-50.0                    | 169,317                         | 74            | 0.002    | 1.45 (1.15, 1.83) | 136,592                     | 60            | <0.001   | 1.59 (1.23, 2.05) |
|                      | <18.5                        | 471,449                         | 487           | <0.001   | 1.42 (1.3, 1.56)  | 421,575                     | 401           | <0.001   | 1.39 (1.26, 1.54) |
|                      | 18.5-24.9                    | 9,721,002                       | 7,437         |          | 1.00 (Reference)  | 8,781,740                   | 6,399         |          | 1.00 (Reference)  |
|                      | 25.0-29.9                    | 2,415,060                       | 2,275         | <0.001   | 1.16 (1.11, 1.22) | 2,171,806                   | 1,962         | <0.001   | 1.17 (1.11, 1.23) |
| Women at 45-54 years | 30.0-50.0                    | 290,586                         | 368           | <0.001   | 1.50 (1.35, 1.66) | 258,018                     | 320           | <0.001   | 1.55 (1.39, 1.74) |
|                      | <18.5                        | 218,040                         | 624           | <0.001   | 1.89 (1.75, 2.05) | 192,036                     | 528           | <0.001   | 1.93 (1.76, 2.1)  |
|                      | 18.5-24.9                    | 8,776,013                       | 13,225        |          | 1.00 (Reference)  | 7,877,415                   | 11,382        |          | 1.00 (Reference)  |
|                      | 25.0-29.9                    | 4,051,084                       | 6,689         | 0.133    | 1.02 (0.99, 1.05) | 3,636,571                   | 5,837         | 0.035    | 1.03 (1, 1.07)    |
| Women at 55-64 years | 30.0-50.0                    | 492,779                         | 1,098         | <0.001   | 1.31 (1.23, 1.39) | 436,925                     | 947           | <0.001   | 1.34 (1.25, 1.43) |
|                      | <18.5                        | 170,137                         | 1,681         | <0.001   | 1.98 (1.88, 2.08) | 147,825                     | 1,346         | <0.001   | 1.97 (1.87, 2.08) |
|                      | 18.5-24.9                    | 5,462,901                       | 25,462        |          | 1.00 (Reference)  | 4,921,892                   | 22,037        |          | 1.00 (Reference)  |
|                      | 25.0-29.9                    | 3,602,137                       | 16,133        | <0.001   | 0.92 (0.9, 0.94)  | 3,255,899                   | 14,215        | <0.001   | 0.93 (0.91, 0.95) |
| Women at 65-74 years | 30.0-50.0                    | 450,261                         | 2,712         | <0.001   | 1.18 (1.14, 1.23) | 405,503                     | 2,364         | <0.001   | 1.19 (1.14, 1.24) |
|                      | <18.5                        | 183,582                         | 5,479         | <0.001   | 1.62 (1.58, 1.67) | 148,986                     | 4,093         | <0.001   | 1.65 (1.6, 1.71)  |
|                      | 18.5-24.9                    | 3,078,560                       | 52,107        |          | 1.00 (Reference)  | 2,704,128                   | 43,482        |          | 1.00 (Reference)  |
|                      | 25.0-29.9                    | 1,836,641                       | 27,175        | <0.001   | 0.89 (0.88, 0.9)  | 1,646,834                   | 23,532        | <0.001   | 0.89 (0.88, 0.9)  |
| Women at 75-99 years | 30.0-50.0                    | 230,238                         | 3,856         | 0.731    | 1.01 (0.97, 1.04) | 206,809                     | 3,359         | 0.761    | 1.01 (0.97, 1.04) |
|                      | <18.5                        | 89,355                          | 7,903         | <0.001   | 1.41 (1.38, 1.45) | 68,838                      | 5,976         | <0.001   | 1.45 (1.41, 1.49) |
|                      | 18.5-24.9                    | 759,606                         | 44,944        |          | 1.00 (Reference)  | 640,440                     | 36,892        |          | 1.00 (Reference)  |
|                      | 25.0-29.9                    | 307,357                         | 15,182        | <0.001   | 0.87 (0.85, 0.89) | 269,775                     | 12,974        | <0.001   | 0.86 (0.85, 0.88) |
|                      | 30.0-50.0                    | 34,125                          | 1,776         | <0.001   | 0.92 (0.87, 0.96) | 30,017                      | 1,529         | 0.001    | 0.92 (0.87, 0.97) |

BMI, body mass index; CI, confidence interval; HR, hazard ratio.

<sup>a</sup> Hazard ratios were calculated using Cox proportional hazards models after adjustment for age at enrollment (continuous variable), sex (men, and women; only in the analysis for both sexes combined) smoking status (current smoker, former smoker, never-smoker, and those with missing smoking status; only in the analysis for all participants), and known pre-existing illness either cured or not (yes, and no including those with missing information).

<sup>b</sup> 4 categories. Analysis was done for comparison with other research using current standard cut-off points.

<sup>c</sup> Age groups at all ages, 18-34 years, 35-44 years, 45-54 years, 55-64 years, 65-74 years, and 75-99 years.

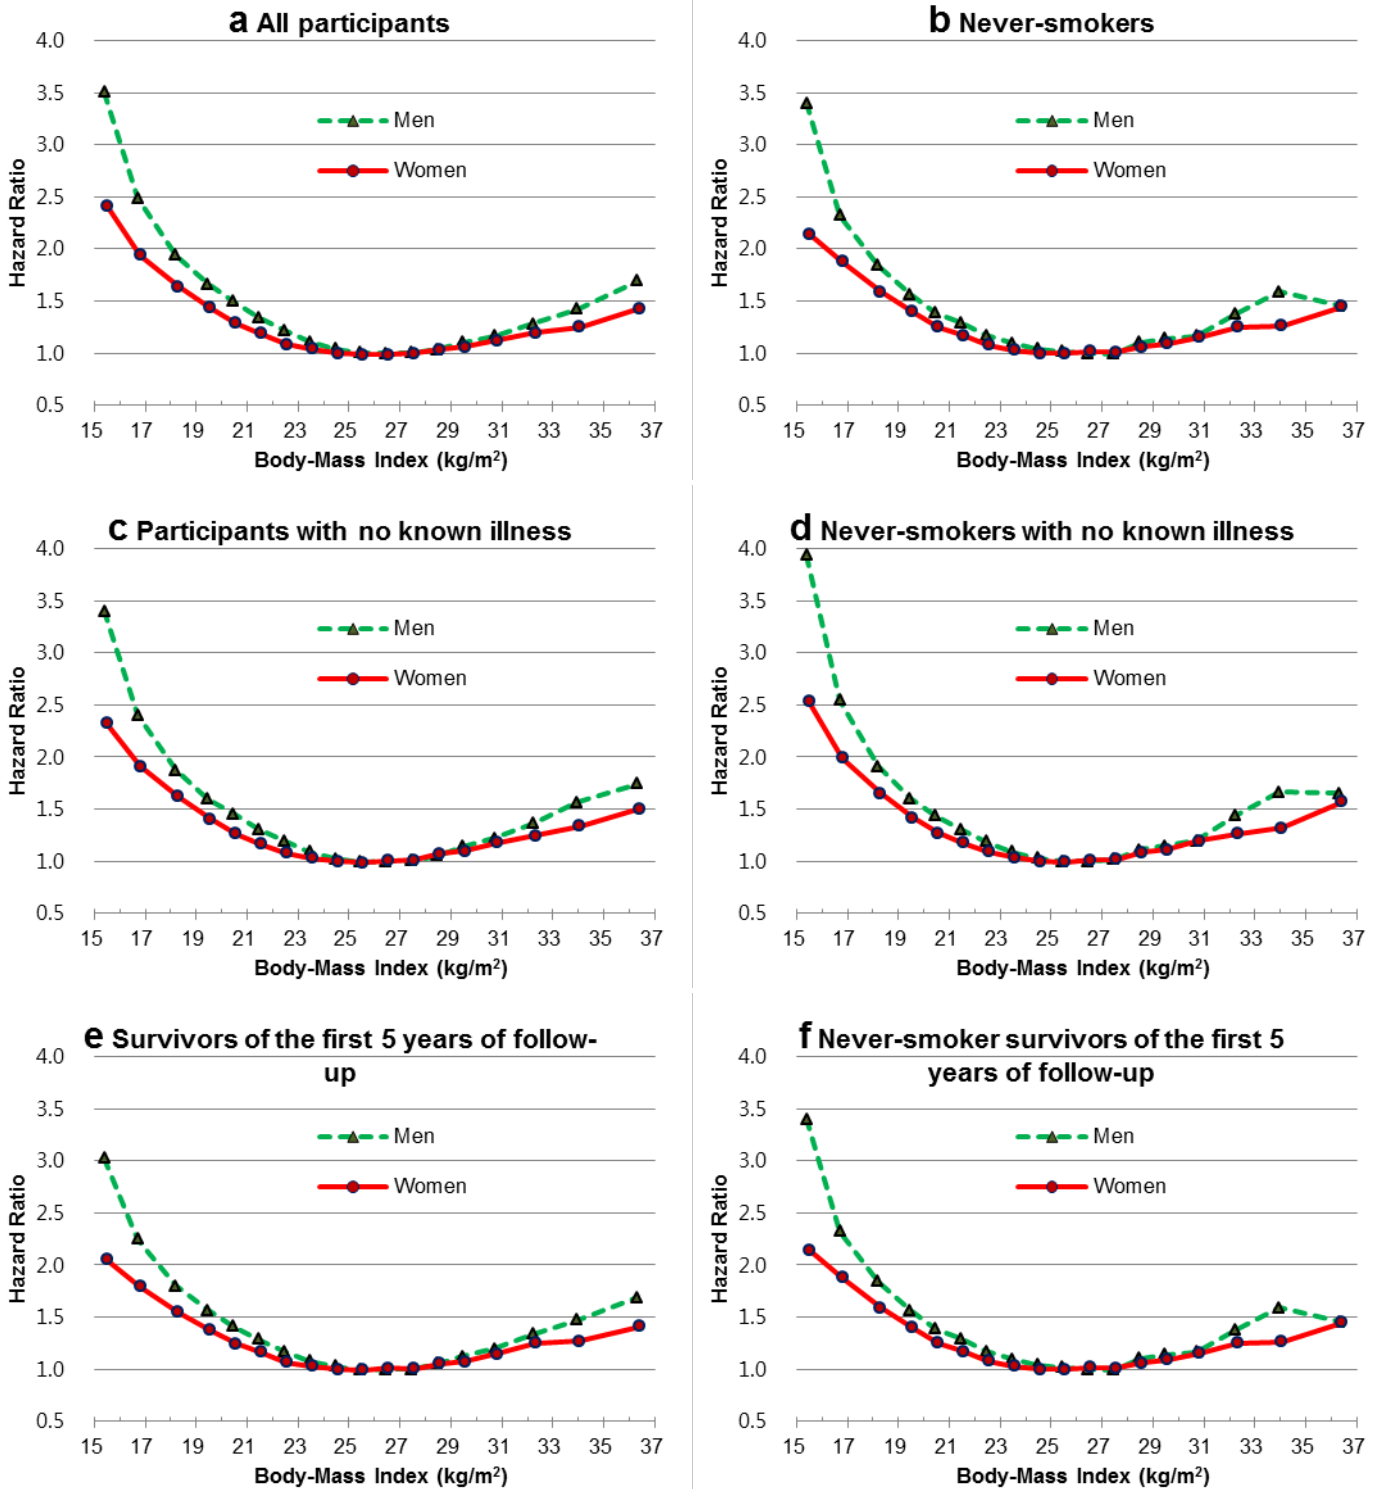

**Figure S1. Hazard ratios of risk of death associated with body-mass index according to subgroup in all participants and never-smokers.**

Hazard ratios were calculated using Cox proportional hazard models. 18 categories of body-mass index (reference: 26.0-26.9 for men and 24.0-24.9 for women) were used. The midpoint was used as a representative value for each body-mass index category, except for both ends (15.5 and 36.4), for which the median of all participants was used. The analyses were adjusted for age, smoking status (except non-smokers), and known pre-existing illness (except people with no known previous illness).



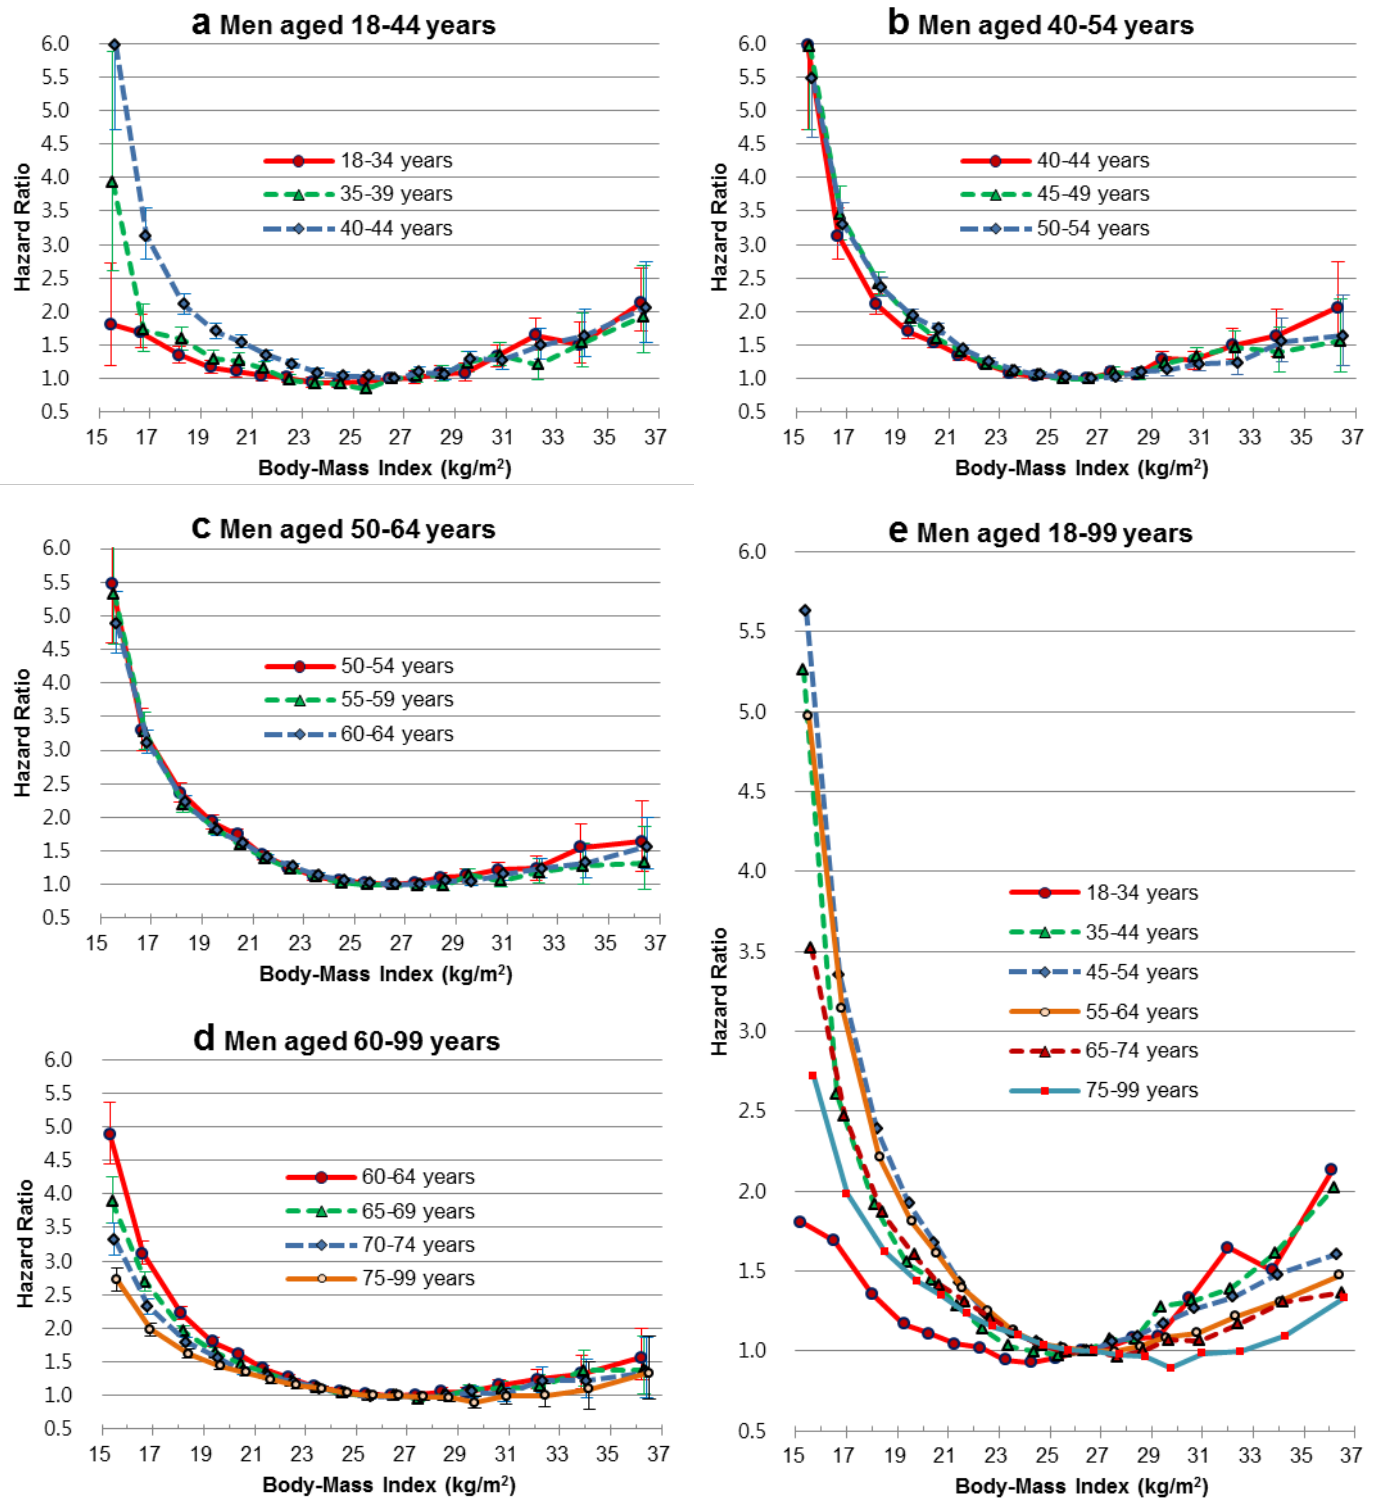

**Figure S2. Age-specific hazard ratios of risk of death associated with body-mass index in men.**

Hazard ratios and 95% confidence intervals were calculated using Cox proportional hazard models. 18 categories of body-mass index (reference: 26.0-26.9) were used. The midpoint was used as a representative value of each body-mass index category, except for both ends (15.5 and 36.4), for which the median of all participants was used. The analyses were adjusted for age, smoking status, and known pre-existing illness.

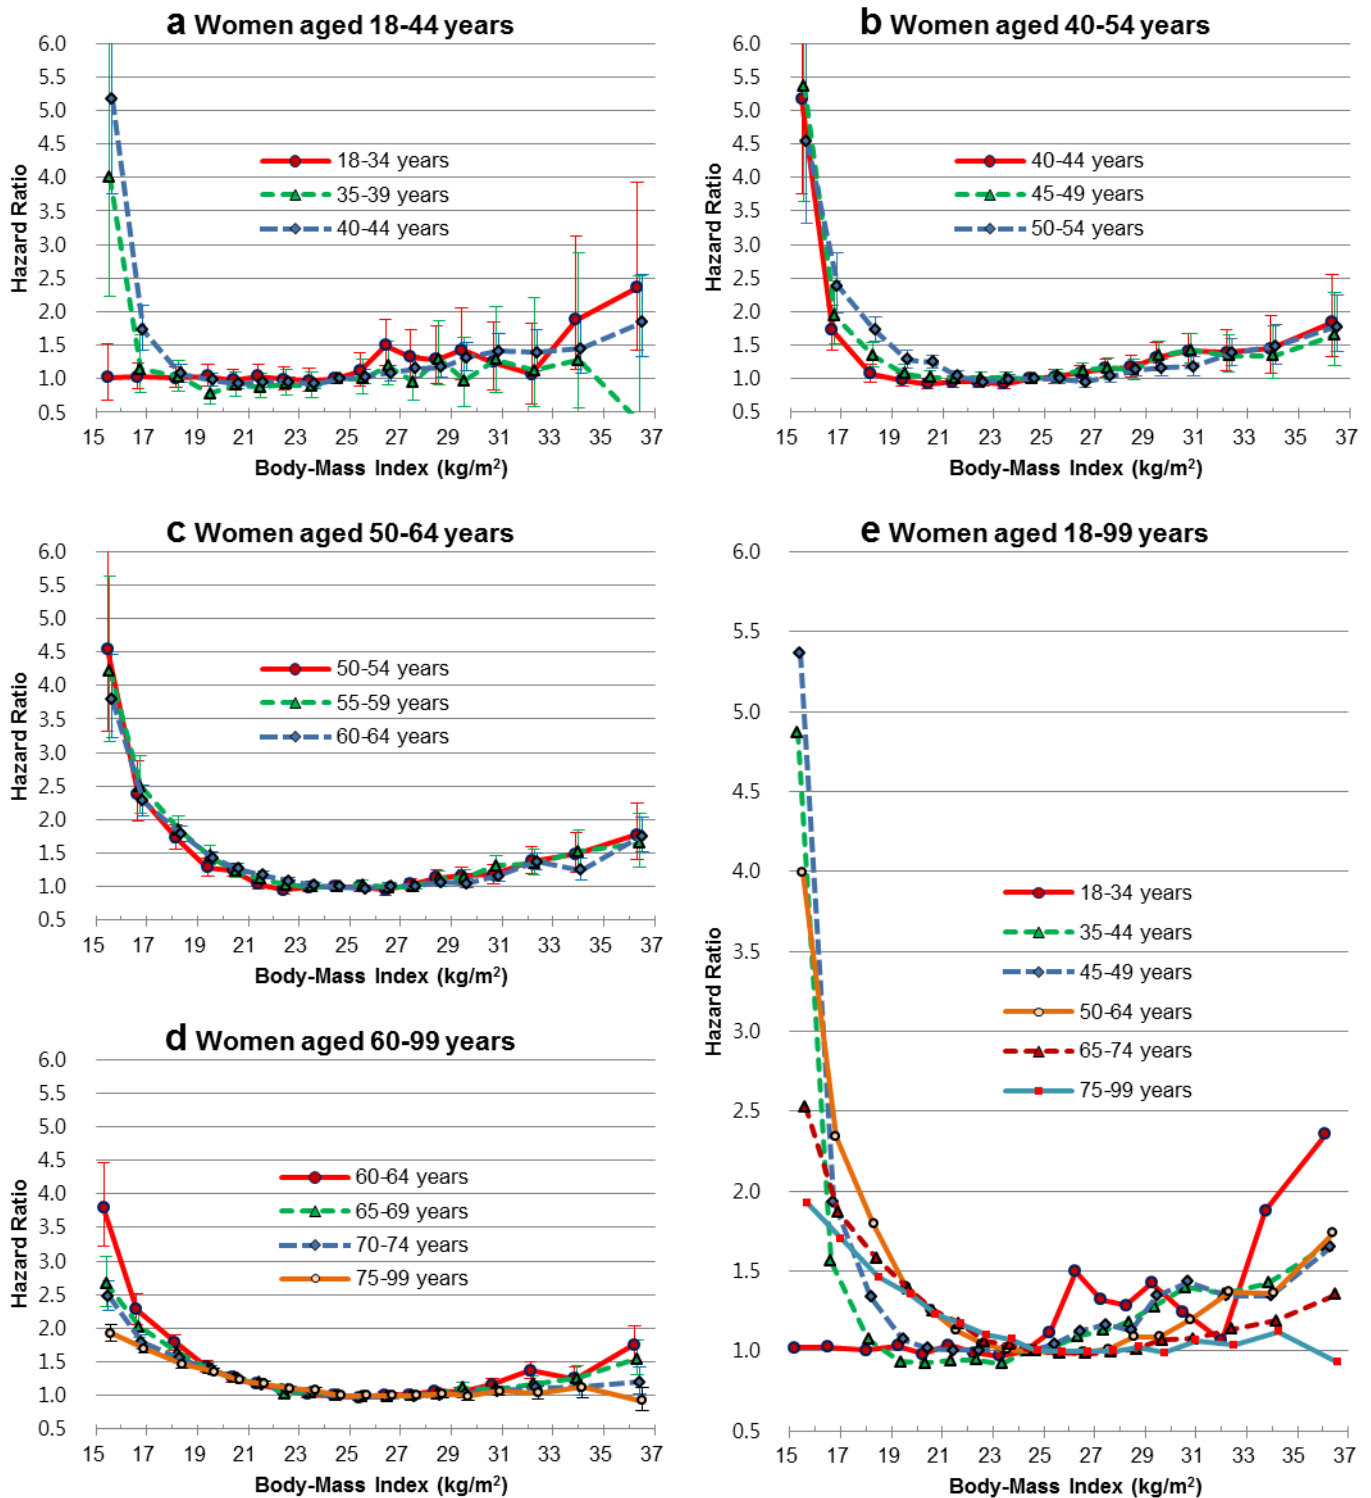

**Figure S3. Age-specific hazard ratios of risk of death associated with body-mass index in women.**

Hazard ratios and 95% confidence intervals were calculated using Cox proportional hazard models. 18 categories of body-mass index (reference: 24.0-24.9) were used. The midpoint was used as a representative value of each body-mass index category, except for both ends (15.5 and 36.4), for which the median of all participants was used. The analyses were adjusted for age, smoking status, and known pre-existing illness.

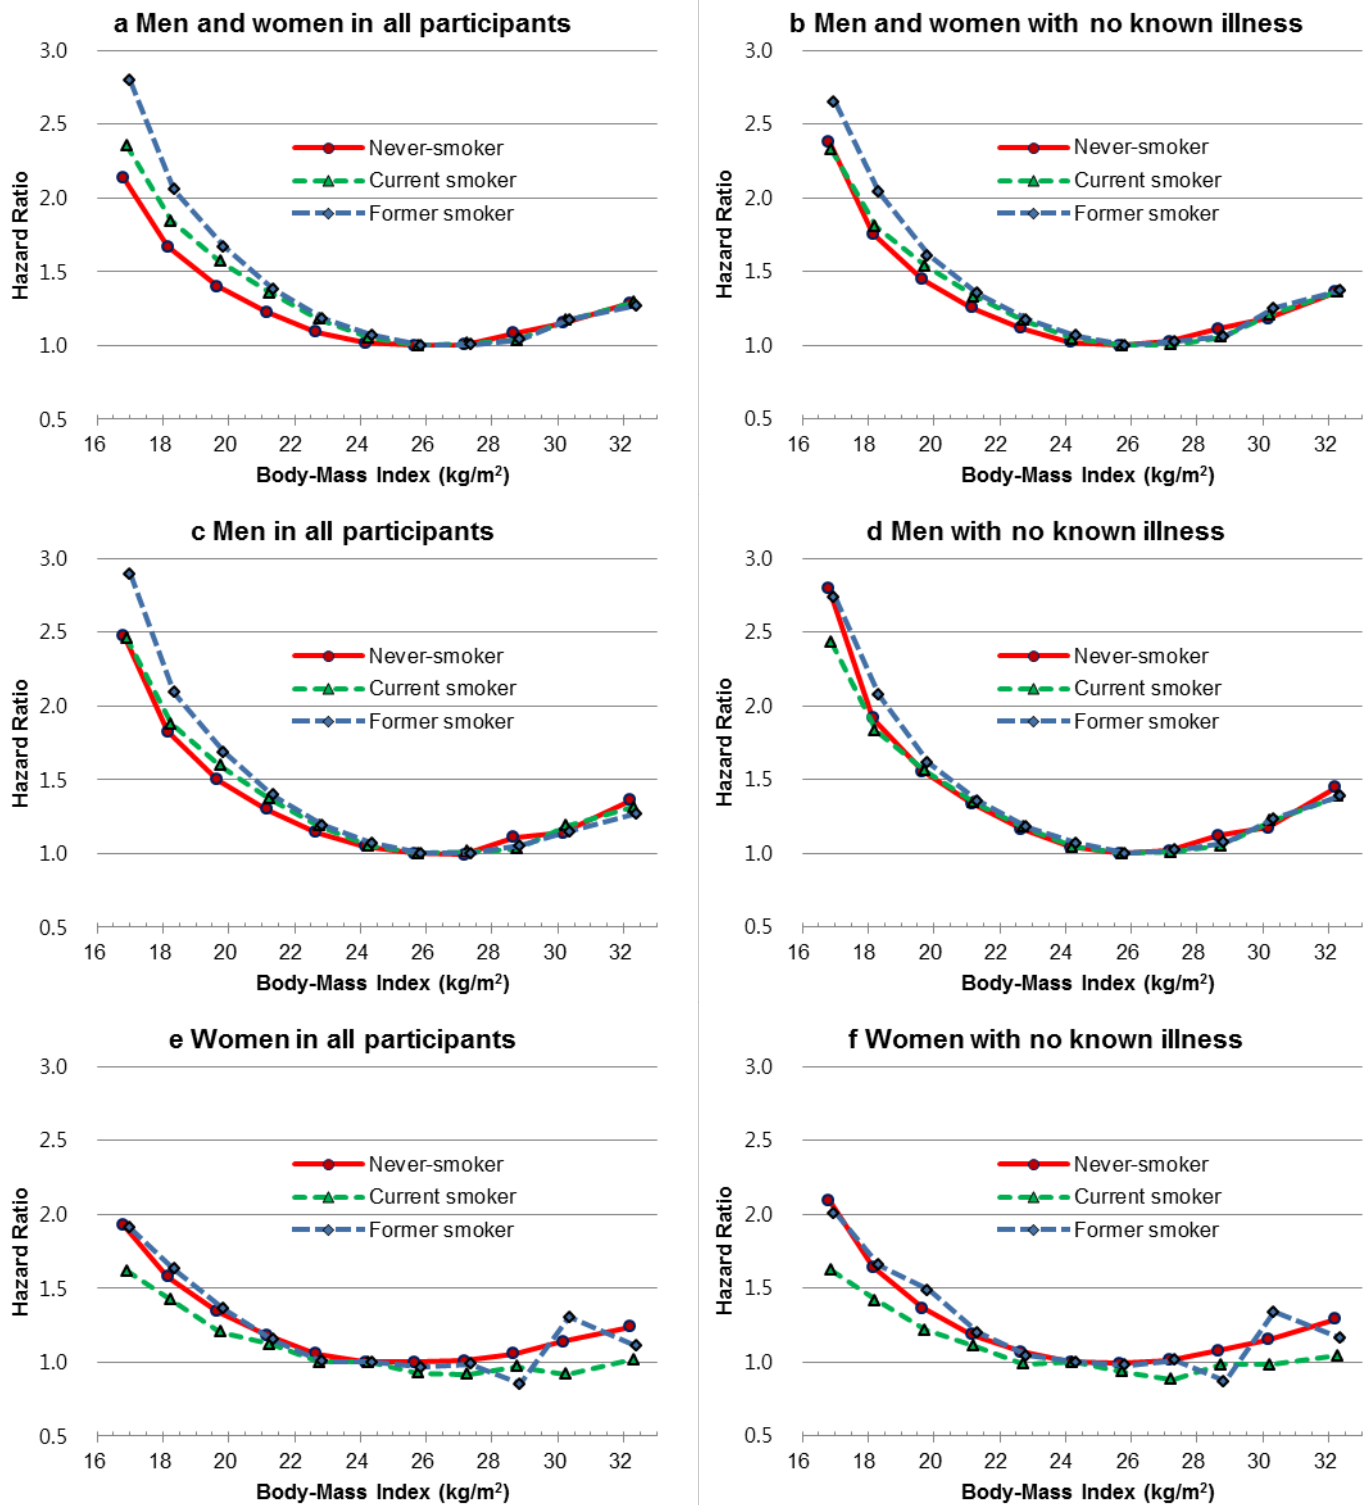

**Figure S4. Hazard ratios of risk of death associated with body-mass index according to smoking status and sex in all participants and those with no known illness.**

Hazard ratios were calculated using Cox proportional hazard models. 11 categories of body-mass index were used (reference: 25.0-26.5 for men and two sexes combined and 23.5-25.0 for women). The midpoint was used as a representative value of each body-mass index category, except for both ends (16.9 and 32.3), for which the median of all participants was used. The analyses were adjusted for age, sex (men, and women; only in the analysis for both sexes combined), and known pre-existing illness (only for all participants).

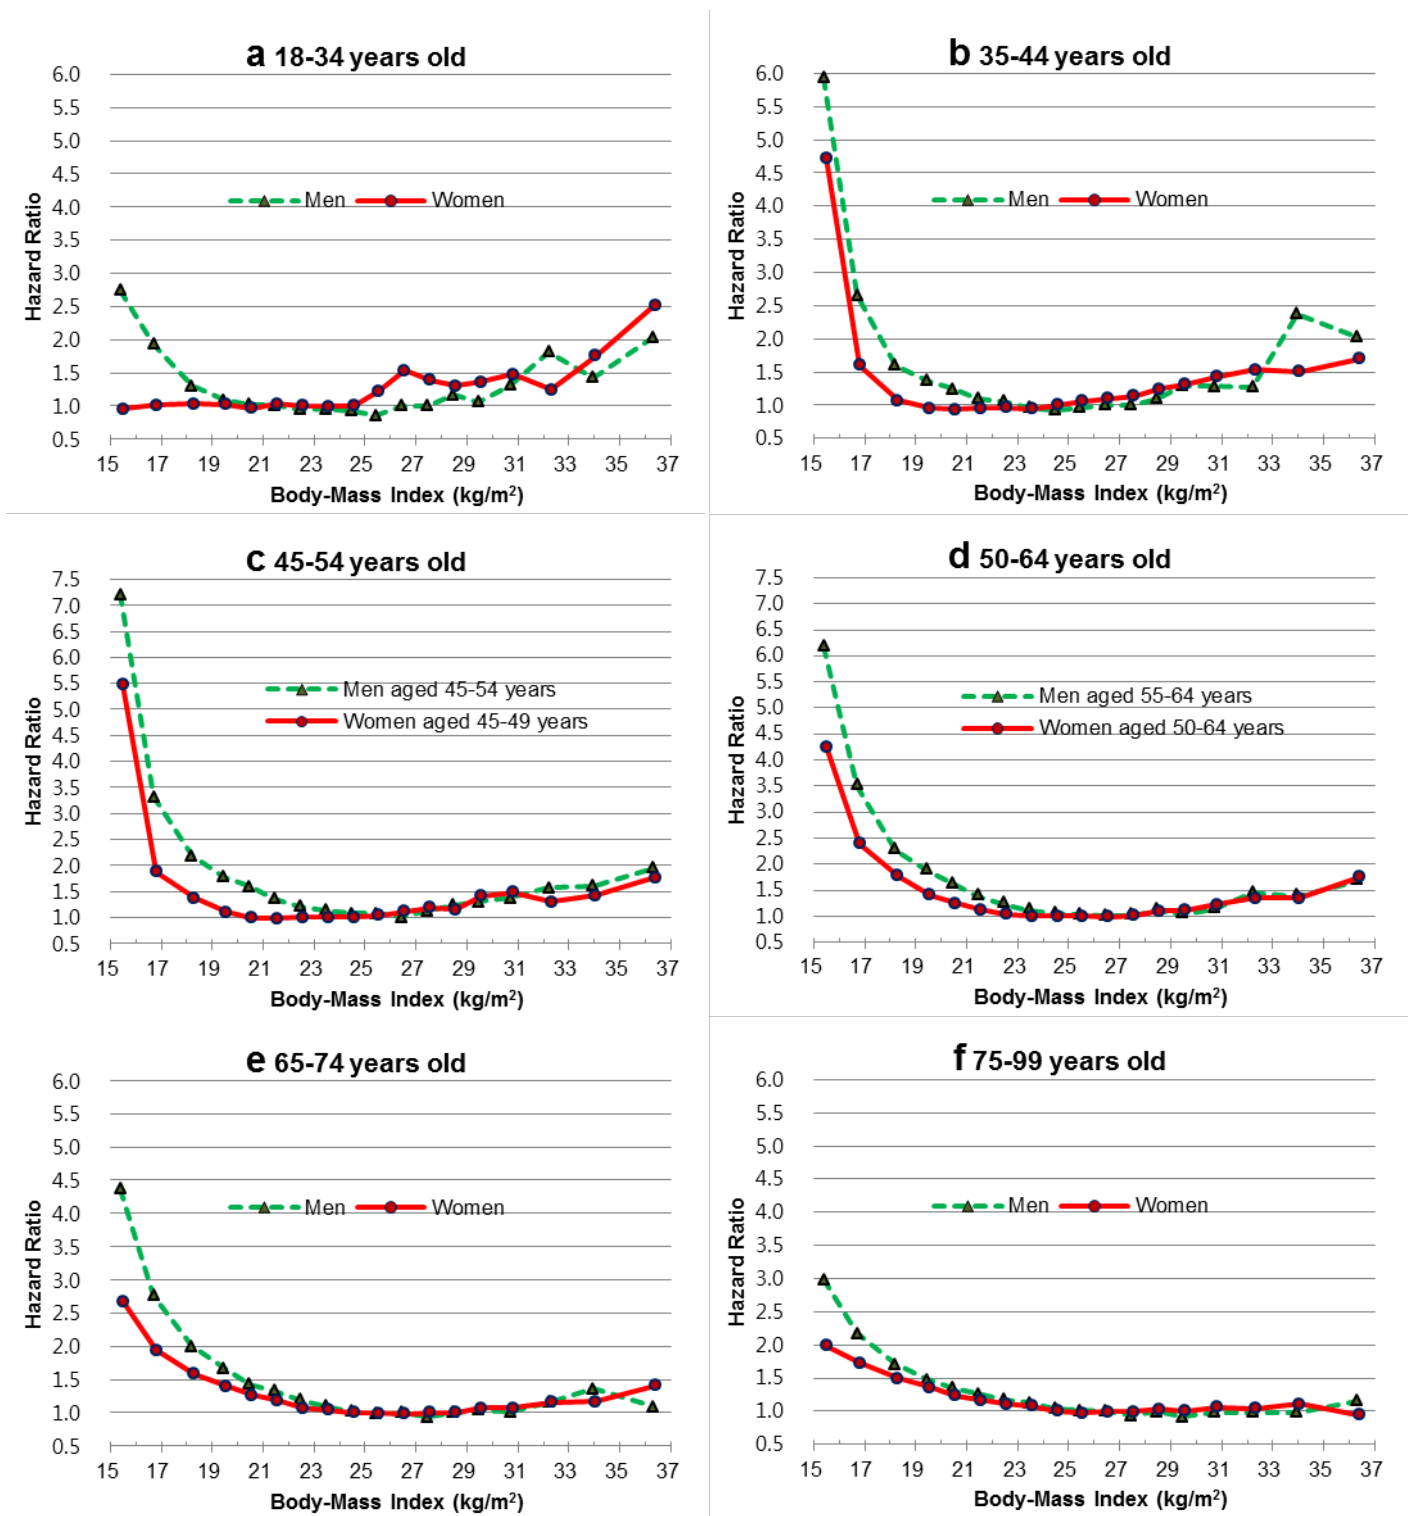

**Figure S5. Sex-age-specific hazard ratios of risk of death associated with body-mass index in never-smokers.**

Hazard ratios were calculated using Cox proportional hazard models. 18 categories of body-mass index (reference: 26.0-26.9 for men and 24.0-24.9 for women) were used. The midpoint was used as a representative value of each body-mass index category, except for both ends (15.5 and 36.4), for which the median of all participants was used. The analyses were adjusted for age and known pre-existing illness.

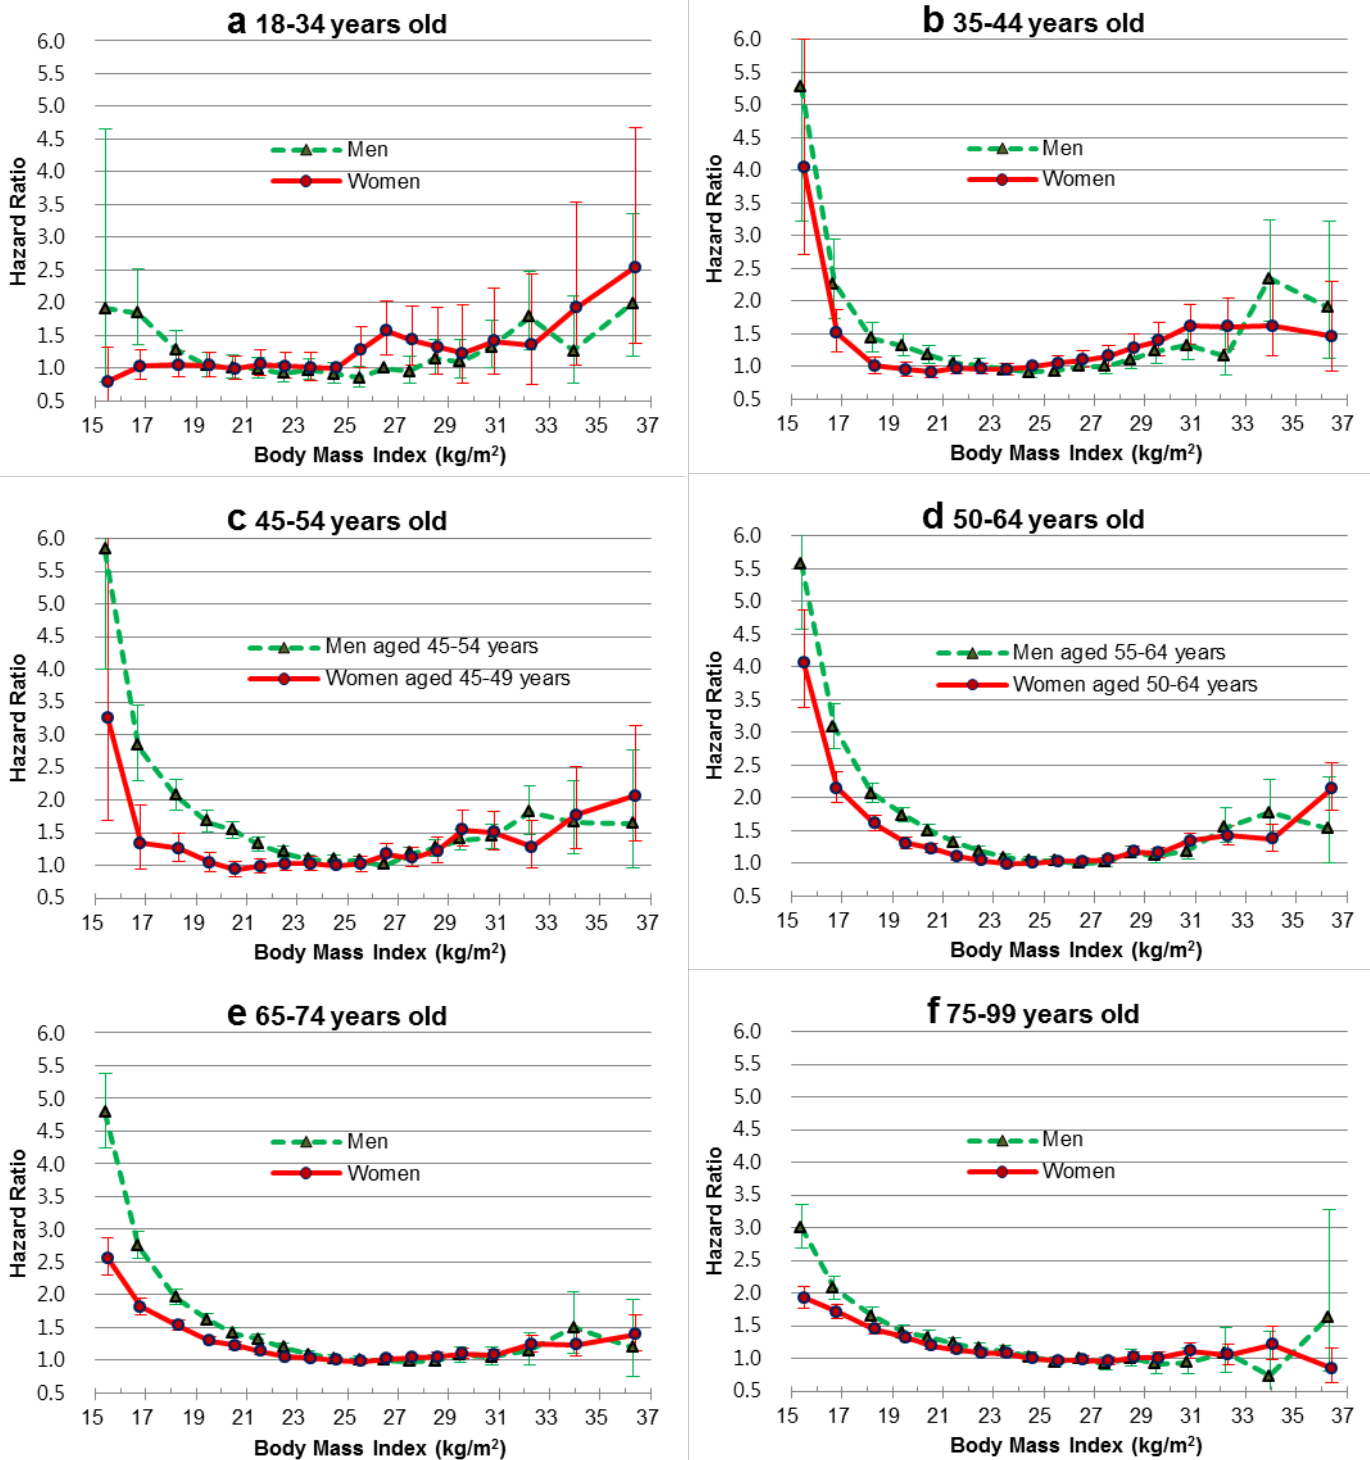

**Figure S6. Sex-age-specific hazard ratios of risk of death associated with body-mass index in never-smokers with no known illness.**

Hazard ratios were calculated using Cox proportional hazard models. 18 categories of body-mass index (reference: 26.0-26.9 for men and 24.0-24.9 for women) were used. The midpoint was used as a representative value of each body-mass index category, except for both ends (15.5 and 36.4), for which the median of all participants was used. The analyses were adjusted for age.

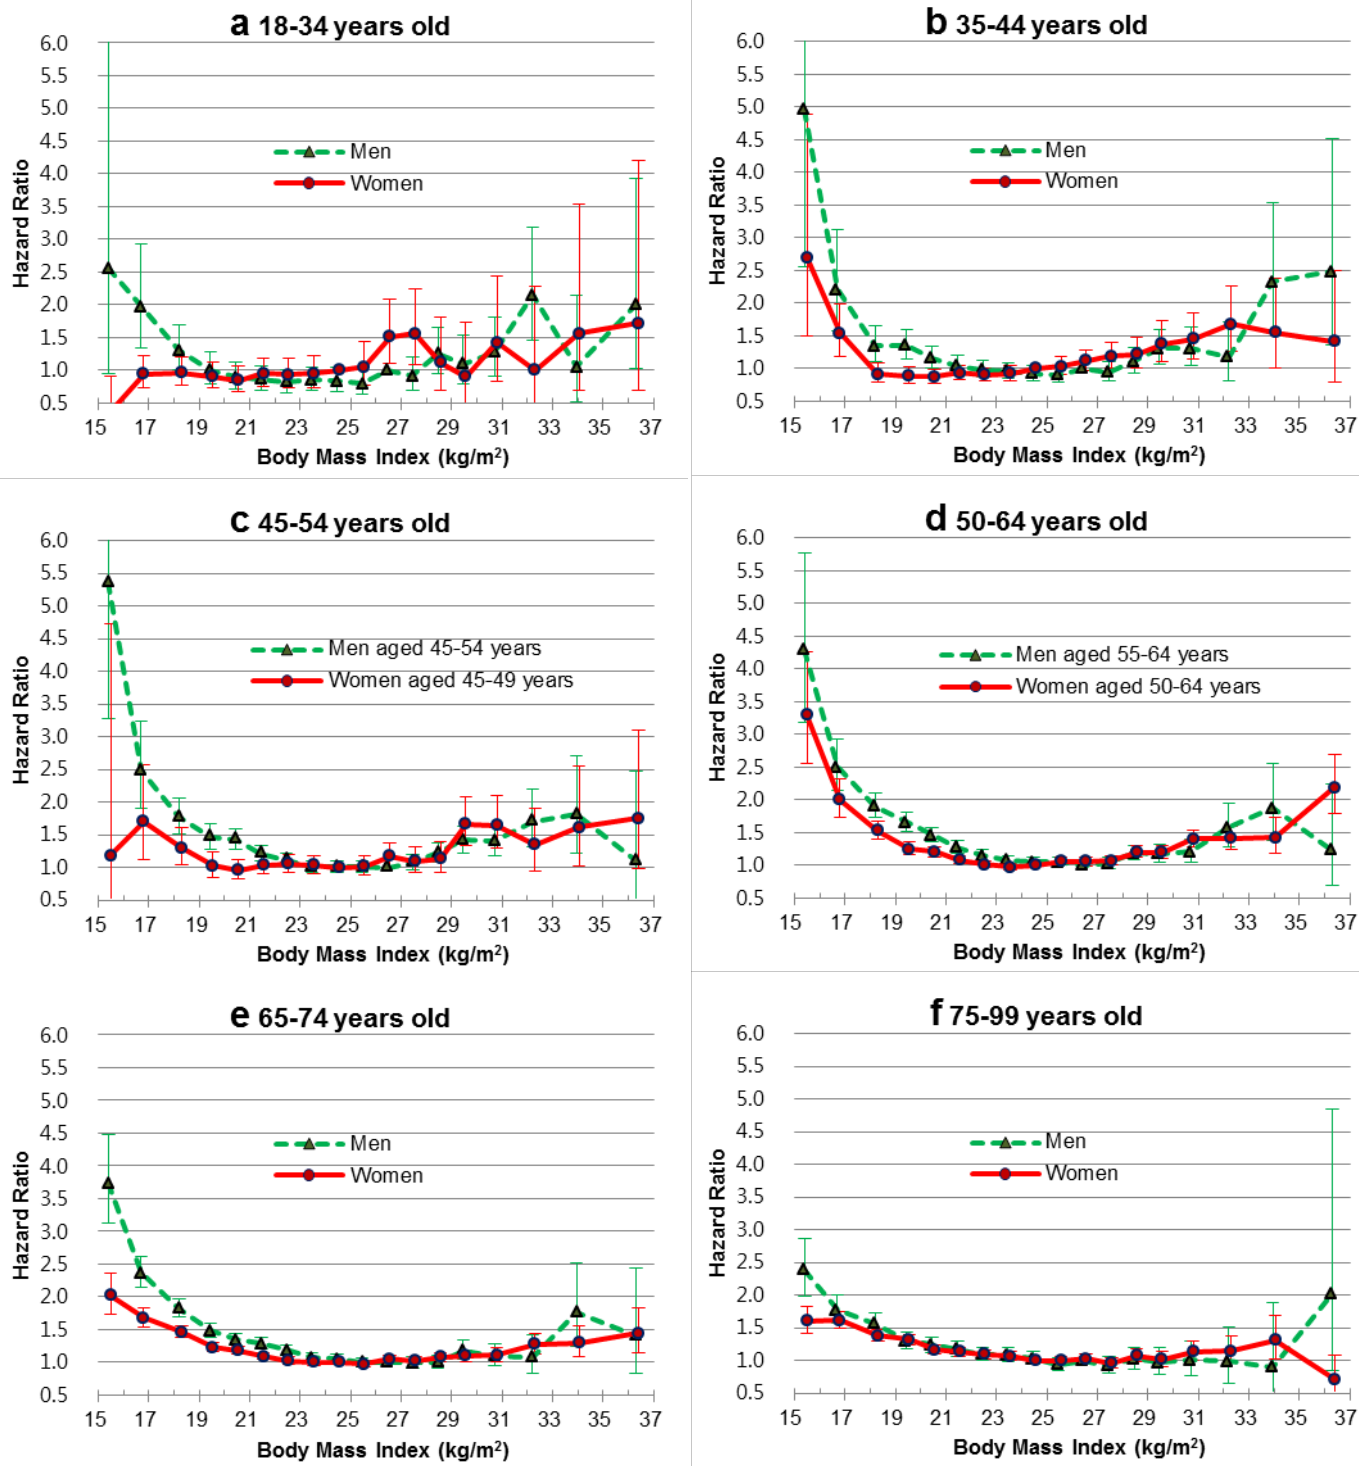

**Figure S7. Sex-age-specific hazard ratios of risk of death associated with body-mass index in never-smokers with no known illness who survived 5 years after enrollment.**

Hazard ratios were calculated using Cox proportional hazard models. 18 categories of body-mass index (reference: 26.0-26.9 for men and 24.0-24.9 for women) were used. The midpoint was used as a representative value of each body-mass index category, except for both ends (15.5 and 36.4), for which the median of all participants was used. The analyses were adjusted for age.



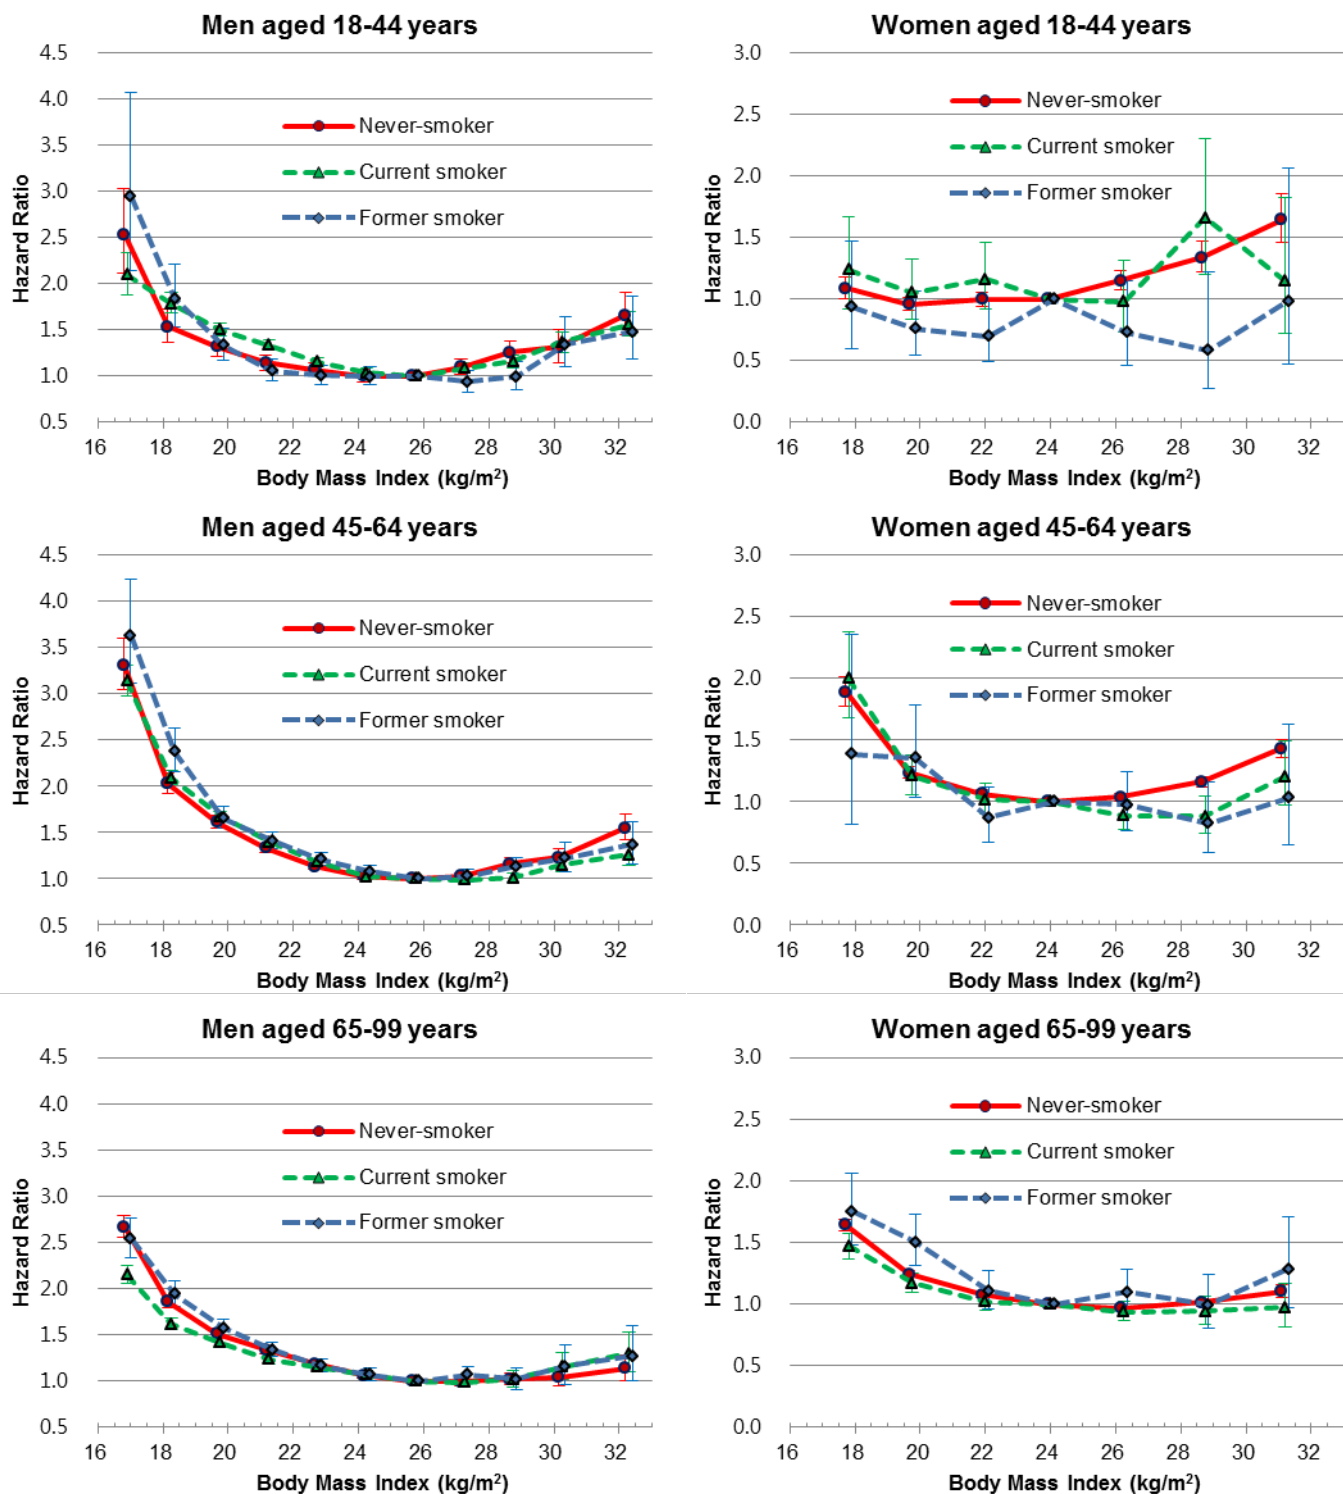

**Figure S8. Age-specific hazard ratios of risk of death associated with body-mass index in participants with no known illness according to sex and smoking status.**

Hazard ratios were calculated using Cox proportional hazard models. 11 categories of body-mass index for men (reference: 25.0-26.4) and 7 categories for women (reference: 23.0-24.9) were used. The midpoint was used as a representative value of each body-mass index category, except for both ends (16.9 and 32.3 for men [due to 11 groups]; 17.8 and 31.2 for women [7 groups]), for which the median of all participants was used. The analyses were adjusted for age.
